## CORTICOTROPIN-RELEASING FACTOR INDUCES FUNCTIONAL AND STRUCTURAL SYNAPTIC REMODELLING IN ACUTE STRESS

Dorien Vandael<sup>1,2</sup>, Keimpe Wierda<sup>2,3,4</sup>, Katlijn Vints<sup>1,2</sup>, Pieter Baatsen<sup>1,2</sup>, Lies De Groef<sup>5</sup>, Lieve Moons<sup>5</sup>, Vasily Rybakin<sup>6</sup>, Natalia V. Gounko<sup>1,2\*</sup>

<sup>1</sup>VIB-KU Leuven Center for Brain & Disease Research, Electron Microscopy Platform & VIB-Bioimaging Core, O&N4 Herestraat 49 box 602, 3000 Leuven, Belgium.

<sup>2</sup>KU Leuven Department of Neurosciences, Leuven Brain Institute, O&N4 Herestraat 49 box 602, 3000 Leuven, Belgium.

<sup>3</sup>VIB-KU Leuven Center for Brain & Disease Research, Electrophysiology Expertise Unit, Herestraat 49, 3000 Leuven, Belgium.

<sup>4</sup>VIB-KU Leuven Center for Brain & Disease Research, Laboratory of Synapse Biology, Herestraat 49, 3000 Leuven, Belgium.

<sup>5</sup>KU Leuven Faculty of Science, Department of Biology, Laboratory of Neural Circuit Development and Regeneration, Naamsestraat 61, 3000 Leuven, Belgium.

<sup>6</sup>National University of Singapore, Department of Microbiology and Immunology, Yong Loo Lin School of Medicine, and Immunology Program, 5 Science Drive 2, Blk MD4, 117545 Singapore, Singapore

\*Corresponding author: Prof. Natalia Gounko  
Herestraat 49, Box 602, 3000 Leuven, Belgium  
Tel. +32 16 374564  
Fax +32 16 330827  
E-Mail: [natalia.gunko@kuleuven.vib.be](mailto:natalia.gunko@kuleuven.vib.be)

**Short title:** CRF role in acute stress

**Key words:** CRF, stress, hippocampus, spines, synaptic plasticity, electron microscopy

## 1 **Abstract**

2 Biological responses to internal and external stress factors involve highly conserved mechanisms,  
3 using a tightly coordinated interplay of many factors. Corticotropin-releasing factor (CRF) plays a  
4 central role in organizing these lifesaving physiological responses to stress. We show that CRF  
5 rapidly and reversibly changes Schaffer Collateral input into hippocampal CA1 pyramidal cells (PC),  
6 by modulating both functional and structural aspects of these synapses. Host exposure to acute  
7 stress, *in vivo* CRF injection, and *ex vivo* CRF application all result in fast *de novo* formation and  
8 remodeling of existing dendritic spines. Functionally, CRF leads to a rapid increase in synaptic  
9 strength of Schaffer collateral input into CA1 neurons, e.g. increase in spontaneous neurotransmitter  
10 release, paired-pulse facilitation and repetitive excitability and improves long-term synaptic plasticity:  
11 LTP and LTD. In line with the changes in synaptic function, CRF increases the number of presynaptic  
12 vesicles, induces redistribution of vesicles towards the active zone increases active zone size, and  
13 improves the alignment of the pre- and post-synaptic compartments. Together, CRF rapidly  
14 enhances synaptic communication in the hippocampus, potentially playing a crucial role in the  
15 enhanced memory consolidation in acute stress.

## 16 Introduction

17 Stress is a fundamental homeostatic reaction to any stimulus (1,2), which can biologically manifest  
18 itself as predominantly positive 'eustress' or predominantly as negative 'distress' (3). Acute stress is  
19 an instantaneous and precise reaction to internal and environmental factors (4–6). Although  
20 mechanisms involved in regulating stress responses are well documented for the hypothalamic-  
21 pituitary-adrenal (HPA) axis pathway, the effect of stress on other regions of the brain is still not well  
22 understood (7,8). Among the many hormones, neuropeptides, and mediators involved in the stress  
23 response, CRF stands out due to its dual systemic (hormonal) and central (neuromodulatory) roles  
24 (8–10). Centrally, CRF acts as a neuromodulator of synaptic transmission which can be rapidly and  
25 locally released and acts within milliseconds (7) by binding to two different G protein-coupled  
26 receptors: CRF-receptor (CRF-R) 1 and 2 (4,7,10). Activation of these receptors can result in a  
27 comprehensive array of cellular effects depending on the brain region and the specific CRF-family  
28 ligand binding (8,11). This can explain the diversity of responses reported in different brain regions  
29 to the same stressor. In the hippocampus, a region known for its involvement in learning and memory  
30 processes, CRF is expressed by GABAergic interneurons, which innervate PCs in CA1 and CA3  
31 (12,13) and these PCs express CRF-Rs in distinct subcellular regions (4,14,15). The effects of stress  
32 on - hippocampus dependent - memory storage and consolidation are complex (4,16–18). Mild or  
33 short stress enhances hippocampal functioning by promoting synaptic strengthening and by  
34 augmenting frequency of mEPSCs and glutamate release probability (7,19), while profound and  
35 chronic stress has detrimental effects, manifesting in the reduction in dendritic complexity and spine  
36 density in the hippocampus (12). This spine loss is associated with attenuation of both long-term  
37 potentiation (LTP) and long-term depression (LTD), and correlates with reported memory defects  
38 (7,20–22). CRF contributes to the initiation of those stress induced neuronal changes (7,12,23,24)  
39 in a dose-, time- and context-dependent manner (4,16,25,26). Especially the period of CRF exposure  
40 can have crucial differential effects on learning and memory processes and might result in opposite  
41 effects (4,16,25). For example, short-term CRF application increases LTP (27) while prolonged  
42 exposure impairs hippocampal LTP (28).

43 Previous studies on structural changes reported a decrease in spine number and reduction of  
44 dendritic complexity of PCs in CA1 and CA3 after long-term exposure to CRF (24,29,30). In addition,  
45 the underlying molecular pathways of CRF-dependent plasticity have been mostly studied in the  
46 presence of high CRF concentrations and using *in vitro* assays. However, the acute effect of CRF in  
47 a physiologically relevant concentration (<250 nM) (8,31,32) on synaptic architecture and function  
48 in the hippocampus remain elusive.

49 Here, we show that acute stress, CRF stereotactic injections *in vivo*, and application of CRF *ex vivo*  
50 induces spine maturation and increases spine density. At the synapse level, we demonstrate that  
51 acute CRF increases the presynaptic vesicular pool size, increases synapse number, induces a  
52 redistribution of synaptic vesicles towards the active zone and increases alignment of pre- and

53 postsynaptic compartments. In line with these structural changes, we found that CRF facilitates  
54 synaptic transmission and increases synaptic reliability. In addition, CRF enhances long term  
55 synaptic plasticity, which requires reciprocal activation of both CRF-R receptors. Taken together,  
56 this study provides evidence that CRF is a crucial player in shaping the cellular response of  
57 hippocampal CA1 PCs during acute stress.

## 58 **Materials and Methods**

### 59 ***Animals***

60 All animal experiments were approved by the KU Leuven Ethical Animal Welfare Committee  
61 (protocol P019/2017) and were performed following the Animal Welfare Committee guidelines of the  
62 KU Leuven, Belgium. Mice were housed in a pathogen-free facility under standard housing  
63 conditions. In total, 113 male C57BL/6Jax mice (P18-20), 24 male Thy1-YFP-H line, B6.Cg-Tg(Thy1-  
64 YFP)HJrs/J (P21-23, JAX 003782) and 4 male C57BL/6J-Tg(Thy1-GCaMP6)GP4.12Dkim/J (P18-  
65 20, JAX 028278) were used.

### 66 ***Acute stress induction and stereotactic injections in vivo***

67 Thy1-YFP-H mice were used for acute stress and stereotactic injections with 100nM CRF. For acute  
68 stress, we used two paradigms: foot shock (FS) and predator odor (PO) (33,34). For PO, mice were  
69 transferred from their home cage to a clean cage and subsequently exposed to either PO (domestic  
70 cat urine/fur mixed with cotton wool) or ambient air (cotton wool, control) (35). The FS was performed  
71 as described before (36). Briefly, control animals stayed in the home cage without any handling.  
72 Acute stress FS protocol was a 0.1mA electrical stimulation for 2 seconds. 20 minutes after the  
73 stimulus, mice were deeply anesthetized with a mixture of ketamine/xylazine and cardiac puncture  
74 was carried out for trunk blood collection. Blood plasma was stored for corticosterone (CORT) ELISA  
75 analysis. Brains were collected after transcardiac perfusion with 4% paraformaldehyde (PFA; EMS)  
76 in 0.1M phosphate buffer (PB; EMS). From each animal, one hemisphere was used for spine  
77 analysis of the PCs dendrites in the proximal region of CA1-Stratum Radiatum (SR), the other  
78 hemisphere was used for *cfos* and corticotropin-releasing hormone (*crh*) mRNA *in situ* hybridization  
79 (ISH) experiments. All acute stress experiments and blood collection were done during the same  
80 time of day (controlled for circadian rhythm).

81 For stereotactic injections of CRF in PCs CA1 hippocampus, mice were anesthetized by isoflurane  
82 and placed in a stereotactic frame with sustained anesthesia during and post injection. 300nl of  
83 100nM CRF with a rate of 10nl/sec was unilateral injected using a Nanoject II Auto-Nanoliter Injector  
84 (Drummond) using stereotactic coordinates: AP-2, ML-1.8, D-1.5 mm. The other (non-injected)  
85 hemisphere was used as a control (37). Animals were perfused with 4% PFA in 0.1M PB, 20 minutes  
86 after the injection. Until sample collection, animals were kept constantly under anesthesia. Brains  
87 were post-fixed at 4°C overnight. The following day, 100µm-thick vibratome sections were made and  
88 used for further processing (see below).

## 89 **Determination of hormone concentrations and ISH after acute stress**

90 Plasma was separated from whole blood and stored at  $-80^{\circ}\text{C}$  until further sample processing. CORT  
91 plasma levels were quantified using a CORT ELISA kit (DE4164, Demeditec Diagnostics). Blood  
92 plasma was 1:20 diluted with standard 0 solutions. Absorbance was determined at 450nm (reading)  
93 and 620-630nm (background subtraction) with a microtiter plate reader.

94 Basescope hybridization was performed with the Basescope Detection Reagent Kit v2-RED  
95 (Advanced Cell Diagnostics). Briefly,  $14\mu\text{m}$ -thick cryosections of fixed frozen Thy1-YFP-H  
96 hemispheres of control and stressed mice were made. Superfrost slides (Thermofisher) with sections  
97 were baked at  $60^{\circ}\text{C}$  for one hour before dehydrating steps of ethanol. After pretreatment solution  
98 steps, sections were incubated with custom-synthesized Basescope probes (*cfos*, BA-Mm-Fos-3zz-  
99 st targeting 676-801 of NM\_010234.3 or *crh*, BA-Mm-Crh-3zz-st targeting 752-893 of NM\_205769.3)  
100 each targeting all predicted transcript variants, followed by amplifying hybridization processes.  
101 Between amplification steps, slices were washed with wash buffer. Finally, slides were incubated  
102 with Fast Red for 10 minutes at room temperature in the dark and counterstained with 50%  
103 hematoxylin before drying at  $60^{\circ}\text{C}$ . Brightfield images were taken with a Marzhauser Express 2 slide  
104 scanner (Nikon) using a 20X objective. After imaging, the layer of PCs CA1 from each section was  
105 used for probe quantification. Probe-positive areas and physical CA1 PC areas were manually  
106 segmented using Microscope Image Browser (MIB) (University of Helsinki) (38). Data have been  
107 expressed as probe-positive areas relative to PCs-occupied areas.

## 108 **Dendritic spine filling ex vivo**

109 For dye filling experiments in hippocampal acute slices, C57BL/6Jax mice were used, as described  
110 (39). Briefly, animals were anaesthetized using isoflurane. After decapitation, the brain was quickly  
111 removed and transferred into ice-cold cutting solution:  $83\mu\text{M}$  NaCl, 2.5mM KCl, 1mM  $\text{NaH}_2\text{PO}_4$ ,  
112 22mM glucose, 26.2mM  $\text{NaHCO}_3$ , 0.5mM  $\text{CaCl}_2$ , 3.3mM  $\text{MgSO}_4$ , 72mM sucrose (Sigma), pH7.4  
113 with 5%  $\text{CO}_2/95\%$   $\text{O}_2$ .  $300\mu\text{m}$  coronal slices were cut with a Leica VT1200 vibratome. Slices could  
114 recover in a  $34^{\circ}\text{C}$  cutting solution for 35 minutes and for 30 minutes at room temperature (RT) prior  
115 to transfer into artificial cerebrospinal fluid (aCSF): 119mM NaCl, 2.5mM KCl, 1mM  $\text{NaH}_2\text{PO}_4$ , 26mM  
116  $\text{NaHCO}_3$ , 4mM  $\text{MgCl}_2$ , 4mM  $\text{CaCl}_2$ , 11mM glucose at pH7.4 with 5%  $\text{CO}_2/95\%$   $\text{O}_2$ . Glass borosilicate  
117 recording pipettes (resistance 3.5-5.5M $\Omega$ ) were filled with 10mM Alexa 568 (Life Technologies)  
118 dissolved in internal solution: 15mM CsMSF, 20mM CsCl, 10mM HEPES, 2.5mM  $\text{MgCl}_2$ , 4mM ATP,  
119 0.4mM GTP, 10mM creatine phosphate and 0.6mM EGTA (Sigma Aldrich). Whole-cell configuration  
120 was used to fill CA1 PCs for 10-15 minutes in control slices and slices incubated with 100nM CRF  
121 added to the aCSF for 20 minutes. Hence, slices are incubated 10 minutes prior to the filling with  
122 aCSF and CRF. Treatment with blockers was carried out by directly adding them to the aCSF  
123 minimal 20 minutes before reaching whole cell mode. For condition of blockers with CRF, CRF was  
124 added 10 minutes after slices were exposed to the specific CRF-R blockers. Sections were fixed  
125 with 4% PFA and 2% sucrose in 0.1M PB at  $4^{\circ}\text{C}$  overnight.

126 ***Spine imaging and analysis ex vivo and in vivo***

127 After 4% PFA fixation overnight, brain slices were washed three times with 0.1 M PB and mounted  
128 using mounting medium (Vectashield). 100 $\mu$ m-thick vibratome sections were made from brains  
129 collected after acute stress paradigms and stereotactic injections of CRF, as described above.  
130 Secondary and tertiary dendrites of PCs in the proximal region of the CA1 were imaged with a  
131 Structured Illumination Microscopy (Elyra S.1, Zeiss) with a 63X plan-apochromat 1.4 oil DIC  
132 objective. Images were processed using the Zeiss software. Dendritic protrusions were counted in  
133 Z-stack (Z-step of 0.025 $\mu$ m) and quantified using ImageJ (NIH). We classified 5 spine types.  
134 Mushroom spines: possess a spine head of more than 0.5 $\mu$ m. Stubby: length shorter than 1.0  $\mu$ m.  
135 Spine head diameter larger than spine length. Thin: length shorter than 1.0  $\mu$ m possessing, spine  
136 head diameter shorter than spine length. Long thin: length between 1.0 and 1.5  $\mu$ m. Filopodia: longer  
137 than 1.5 $\mu$ m.

138 ***Electrophysiological and multi electrode array (MEA) ex vivo studies***

139 *Ex vivo*: Acute slices (300 $\mu$ m) were prepared from C57BL/6Jax mice the same way as for *ex vivo*  
140 spine fillings, as described before (39). After recovery, brain slices were continuously perfused in a  
141 submerged chamber (Warner Instruments) at a rate of 3-4 ml/minutes with aCSF at pH7.4 with 5%  
142 CO<sub>2</sub>/ 95% O<sub>2</sub>. Control slices and slices incubated with 100nM CRF added to the aCSF for ~20  
143 minutes before recording were used. For mEPSCs, coronal sections were prepared and 1 $\mu$ M  
144 tetrodotoxin (TTX) was added to the aCSF. For paired-pulse recordings, train stimulation, and  
145 AMPA/NMDA characterization, sagittal slices were used and 20 $\mu$ M bicuculline was added to the  
146 aCSF. Whole-cell patch-clamp recordings were done using borosilicate glass recording pipettes  
147 (resistance 3.5-5.5M $\Omega$ ) filled with a CsMSF-based internal solution (see *ex vivo* spine filling).  
148 Spontaneous input to CA1 PCs was recorded by whole-cell voltage-clamp recordings ( $V_m$ =-70mV  
149 and  $R_s$  compensation was set at ~70%) from visually identifiable CA1 PCs, using a Multiclamp 700B  
150 amplifier (Axon Instruments) and analyzed using Mini Analysis program (Synaptosoft). For evoked  
151 recordings ( $V_m$ =-70 mV,  $R_s$  compensation ~70%), Schaffer collaterals were stimulated using A-M  
152 systems 2100 isolation pulse stimulator and a 2-contact cluster microelectrode (CE2C55, FHC)  
153 placed in SR at the border of CA1-CA2. For paired-pulse ratio analysis, paired extracellular  
154 stimulations (interstimulus interval (ISI): 25, 50, 100, 200, 400, and 1000ms) were delivered every  
155 20 seconds (each ISI was repeated 3 times) and peak amplitudes were calculated as the  
156 EPSC<sub>2</sub>/EPSC<sub>1</sub> ratio. For train stimulations, 200 stimuli were delivered at the following frequencies:  
157 2Hz, 5Hz, 10Hz, and 20Hz. Peak amplitudes and total charge were quantified and normalized to the  
158 first evoked response of the train. Peak AMPAR-mediated evoked EPSCs were measured in whole-  
159 cell voltage-clamp at a holding potential of -60mV, while the NMDAR-mediated component was  
160 measured 100ms after initiation of the combined AMPAR-and NMDAR-mediated EPSCs recorded  
161 at +40mV. Measurements were performed in a minimum of three independent preparations.

162 *MEA*: Parasagittal slices (300  $\mu$ m) were prepared from C57BL/6Jax mice and used for fEPSPs  
163 recording using commercially available MEAs, 60 electrodes in an 8x8 lay-out (MEA2100, Multi  
164 Channel Systems) as described before (40,41). The recording chamber was perfused with aCSF  
165 and maintained at 32°C. A slice grid was put on the top of the slices to assure immobilization and  
166 optimal contact with electrodes. Data streams were sampled at 10 kHz. For each slice, a single  
167 electrode located underneath the Schaffer collateral pathway was visually selected for stimulation.  
168 Biphasic, constant voltage pulses (100 $\mu$ s pulse width) were applied to evoke fEPSPs from the  
169 Schaffer collaterals (SC) in the CA1. After establishing stable fEPSP signals (after approximately 30  
170 minutes), an input/output curve was generated using stimulation intensities from 0.5 to 2.750V (in  
171 steps of 0.25V), each applied twice with 30-120 seconds interval was established. The stimulus  
172 intensity eliciting 35% of the maximal fEPSP amplitude was used for further stimulation.

173 Next, we recorded baseline fEPSPs for approximately 25 minutes (3 stimulations 15 seconds apart,  
174 every 3 minutes). For CRF conditions, after 5 minutes of baseline, we switched to aCSF with 100nM  
175 CRF, recorded 15 minutes of baseline, switched back to aCSF which normalized a stable baseline  
176 comparable to before CRF application. After reestablishing a stable baseline, we either applied train  
177 stimulations (LTP) or low frequency stimulations (LTD). LTP was introduced by three trains of high-  
178 frequency stimulation at 100Hz (100 stimuli at 100Hz), with 5 minutes interval. For induction of LTD,  
179 low frequency stimulation of 1Hz, 900 pulses was induced to introduce LTD in the CA1 region. Post-  
180 LTD or -LTP induction, fEPSPs were recorded for 65 minutes (3 stimulations 15 seconds apart,  
181 every 3 minutes).

### 182 ***Calcium imaging in vivo***

183 Acute coronal slices (300 $\mu$ m) were prepared from Thy1-GCaMP6 mice (see above). After recovery,  
184 brain slices were continuously perfused with aCSF during the imaging of the CA1 at RT with a two-  
185 photon system (VIVO 2-Photon platform, Intelligent Imaging Innovations GmbH) using a 20X  
186 objective. Imaging started in aCSF capturing 300 images of the region of interest (ROI), average of  
187 15 frames per image, 30ms intervals. 600 images were taken: 300 control aCSF images and another  
188 300 images where CRF was present in the aCSF. After 15 minutes with CRF in aCSF, another 600  
189 images were taken with the same settings in the same ROI.

### 190 ***Electron microscopy (EM) and analysis***

191 Acute coronal slices (300 $\mu$ m) were prepared from C57BL/6Jax mice (see above). After recovery,  
192 control and CRF-treated slices (100nM CRF for 20 minutes) were fixed for at least 2 hours at room  
193 temperature. For synaptic morphology we used 4% PFA, 2% glutaraldehyde (EMS, USA), 0.2%  
194 picric acid (EMS, USA) in 0.1M PB, pH7.4 For active zone (AZ) and postsynaptic densities (PSD)  
195 quantification, we used 4% PFA in 0.1M PB, pH7.4.

196 For synaptic morphology analysis with transmission electron microscopy (TEM), after fixation slices  
197 were subsequently washed with 0.1M PB and 0.1M cacodylate buffer and post-fixed for 60 minutes

198 on ice in 0.1M cacodylate buffer (EMS, USA) containing 1% OsO<sub>4</sub> (EMS, USA) and 1.5% C<sub>6</sub>FeK<sub>4</sub>N<sub>6</sub>  
199 (EMS, USA), pH 7.6. Next, slices were washed once with 0.1M cacodylate buffer, and then with  
200 dH<sub>2</sub>O. The slices were contrasted with 0.5% uranyl acetate (EMS, USA) in 25% methanol at 4°C  
201 overnight. The following day, slices were washed with dH<sub>2</sub>O and stained on bloc with Walton's lead  
202 aspartate (39) at 60°C for 30 minutes, and washed with dH<sub>2</sub>O. Afterwards, the samples were  
203 dehydrated in a graded series of ethanol solutions and were treated twice for 10 minutes with  
204 propylene oxide and infiltrated with medium Epon 812/propylene oxide mixtures. The next day,  
205 sections were flat embedded in medium composition of Epon 812 (EMS, USA) between two  
206 microscopic slides and ACLAR film (EMS) and polymerized for 2 days at 60°C.

207 For visualization and analysis of AZ and PSD with TEM and focused ion beam scanning electron  
208 microscope (FIB-SEM), After fixation slices were washed with 0.1M PB. and dehydrated in a graded  
209 series of ethanol solutions. Afterward, slices were treated for 30 minutes at 60°C in 1% ethanolic  
210 phosphotungstic acid (PTA; MP Biomedicals). Slices were washed with pure ethanol and  
211 subsequently with pure acetone. The slices were contrasted with 2% uranyl acetate in acetone at  
212 60°C for 20 minutes. Slices were then washed with acetone and incubated in 0.5% lead acetate in  
213 acetone at 60°C for 20 minutes, washed with acetone and infiltrated with hard Epon 812/acetone  
214 mixtures. The next day, slices were embedded in hard composition of Epon 812 and polymerized  
215 for 2 days at 60°C.

216 For TEM imaging ultrathin sections (70 nm) were collected on single slot copper grids and  
217 counterstained with uranyl acetate and lead citrate. Images of these sections were made at 25kX  
218 magnification for synaptic boutons morphology and at 15kX magnification for AZ/PSD analysis, using  
219 a TEM (JEM1400, Jeol) equipped with a SIS Quemesa (Olympus) camera operated at 80kV.

220 For the FIB-SEM, the embedded samples were coated with ~8 nm platinum. FIB-SEM imaging is  
221 performed using a Crossbeam 540 (Zeiss) system with Atlas 3D software. The FIB-SEM was used  
222 to remove a 5nm-thick layer by propelling gallium ions at the surface of the specimen. Image  
223 acquisition was done at 1.5kV (0.005 μm/pixel) using a backscattered electron detector, at 5kX  
224 magnification. Images were aligned with Atlas 3D software.

225 PCs CA1 synapses were identified by their morphology and localization. Image segmentation of  
226 individual pre- and postsynaptic terminals, PSDs, AZs and synaptic vesicles was performed initially  
227 by using MIB software. For vesicle analysis, we estimated the shortest straight path connecting the  
228 center of vesicle to the AZ and calculated the smallest angles between the directions of this path.  
229 The statistics for synaptic surface area, AZ/PSD area and length, number of vesicles and distance  
230 from AZ was collected using a custom-made script in ImageJ. Amira software was used for  
231 visualization of AZs and PSDs in 3D.



## 232 **Drugs and treatments**

233 The used dilutions: Alexa 568 hydrazide - 10 mM (Thermo Fisher Scientific), Antisauvagine-30  
234 (aSvg) - 150 nM (Tocris), bicuculline - 20  $\mu$ M (Sigma Aldrich), CRF - 100 nM (Bachem), NBI 27914  
235 (NBI) - 1.2  $\mu$ M (Tocris), TTX - 1  $\mu$ M (Tocris). Besides Alexa568, all drugs were dissolved in DMSO  
236 prior added into used solutions.

## 237 **Quantification and statistical analysis**

238 Data analysis was carried out in ImageJ (NIH), Clampfit (Molecular devices), MiniAnalysis  
239 (Synaptosoft), Multichannel analyzer software (Multi channel systems), Microscope Image Browser  
240 (MIB, University of Helsinki), Amira (Thermo Scientific), Atlas 3D (Zeiss) and Excel (Microsoft). Data  
241 statistic was carried out in GraphPad Prism 8 (GraphPad software).

242 We first evaluated the quantitative sample distributions for normality using the D'Agostino-Pearson  
243 test. Subsequently, either Mann-Whitney test (for non-normal distributions) or unpaired t-test (for  
244 normal distributions) was used to compare statistical differences between any two groups.  
245 Comparisons between multiple groups were performed with the Kruskal-Wallis analysis of variance  
246 (ANOVA) followed by Dunn's multiple comparison test (for non-normal distributions) or with one-way  
247 ANOVA followed by Dunnett's multiple comparison test (for normal distributions). Results were  
248 evaluated at a 5% significance level.

## 249 **Results**

### 250 ***Both short-term stress and CRF treatment induce spine formation in vivo***

251 Previous studies in different brain regions have shown stress induces changes in spine density and  
252 morphology (42–45). To investigate the effect of short-term stress on spines of hippocampal CA1  
253 PCs *in vivo*, we compared two independent models for acute, mild stress in mice expressing YFP in  
254 CA1 PCs (Thy1-YFP-H): 1) foot shock (FS) and 2) predator odor (PO). Corticosterone levels were  
255 mildly elevated in blood plasma 20 minutes after FS and PO acute stress paradigms (Sup. Fig.1a-  
256 b). These data fit with the initial phase of the stress response, since plasma cortisol levels have been  
257 reported to significantly increase only 30 minutes to an hour after stress induction (46–48). In both  
258 paradigms, we found a significant increase in spine density compared to unstressed animals (Fig.1a-  
259 c). In addition, acute stress using the FS paradigm shifts spine morphology towards more mature  
260 types (Fig.1e,d): mushroom and stubby (49,50). In PO experiments, both the increase in spine  
261 density and the shift in spine morphology (Fig.1f) were less prominent compared to FS. Since acute  
262 stress-induced changes of corticosterone levels in the hippocampus and other brain regions takes  
263 at least 30 minutes, (51,52) a systemic component is very unlikely to be involved in the structural  
264 changes in spine density and morphology we find within 20 minutes after acute stress induction.

265 Next, we performed stereotactic injections of CRF into CA1 of YFP-expressing mice to determine  
266 whether CRF has the same effect on spines as acute stress. Indeed, CRF significantly increased

267 spine density compared with control (Fig.1a,d) and induced a shift in spine morphology towards  
268 more mature types (mushroom and stubby), comparable to the acute stress paradigms (Fig.1e-g).  
269 To confirm our direct stress response in the hippocampus we performed *in situ* hybridization analysis  
270 for immediate early genes *crh* and *cfos*. (53–55), in mice 20 minutes after being subjected to FS.  
271 We observed a local increase of *crh* and *cfos* mRNA expression in the CA1 PC layer (Fig.1h-i),  
272 demonstrating an upregulation of immediate early genes in the CA1 PC layer directly after acute  
273 stress.

### 274 ***Acute CRF exposure increases the spine density of CA1 pyramidal cells***

275 To allow a more detailed analysis of the molecular pathway and functional consequences of acute  
276 CRF exposure in CA1 PCs, we investigated if the effect of direct CRF injections on spines can be  
277 recapitulated in acute hippocampal slices. Indeed, short-term CRF application significantly increased  
278 spine density and maturation of dye-filled PCs in acute hippocampal slices (Fig.2a,b).

279 Using acute slices, we set out to identify the underlying CRF receptors involved in mediating the  
280 acute spine changes, by pretreating acute slices with their selective antagonists (CRF-R1:NBI 27914  
281 (NBI);  $K_i=1.7$  nM, CRF-R2: Antisauvagine-30 (aSvg);  $K_i=1.4$  nM) immediately before CRF treatment.  
282 Application of either antagonist alone did not significantly affect spines of CA1 PCs (Fig.2a,b).  
283 Inhibition of CRF-R1s completely blocked the CRF-induced increase in spine density and maturation  
284 (Fig.2a-c), while inhibition of CRF-R2 partially blocked this CRF effect (but significant,  $p=0.0027$ ).  
285 Together, these data show that the acute CRF-induced increase in mature spine number is  
286 predominantly dependent on CRF-R1 signaling, although CRF-R2s can play a complementary role,  
287 potentially requiring the deployment of calcium stores (56).

288 The changes in spine density and maturation sustained at least 1.5 hours after removal/wash out of  
289 CRF, suggesting these are long-lasting structural modifications (data not shown).

### 290 ***Acute CRF exposure modulates functional properties of Schaffer Collateral*** 291 ***input into CA1***

292 To determine if the CRF-induced increase in (mature) spine density translates into enhanced  
293 functional synaptic connections, we set out to study synaptic function, starting with recording  
294 miniature excitatory postsynaptic potentials (mEPSCs) in CA1 PCs. Using pre-treated acute slices  
295 with 100nM CRF (incubation started 15 minutes before and continued throughout the recordings),  
296 we showed a robust increase in mEPSC frequency, but not amplitude (Fig.3a-e). This finding  
297 suggests or an increase in the number of excitatory synapses, or an increase in release probability  
298 of individual synaptic connections, or an increase in neuronal network activity. We already found a  
299 CRF-induced increase in mature spine density, in line with an increase in functional synaptic  
300 connections. However, we also found ultrastructural changes within synapses, that are in line with  
301 an increase in release probability (see below) and CRF-induced enhanced network activity as  
302 evident from our calcium imaging of CA1 PCs in *ex vivo* acute slices from mice expressing the

303 fluorescent calcium indicator, GCaMP6s (Sup.Fig.2, Sup.Video1). Together, these data suggest that  
304 the CRF-induced increase in mEPSC frequency is due to a combination of structural and functional  
305 adaptations.

306 To explore alterations of presynaptic release probability in more detail, we used electrical  
307 stimulations of the Schaffer collateral (SC) pathway projecting onto the CA1 PCs. Using paired pulse  
308 stimulations, we found increased facilitation (PPF) with 25ms and 50ms intervals in the presence of  
309 CRF (Fig.3f-j), suggesting a change in the functional organization of SC presynaptic terminals. We  
310 observed a striking increase in the decay time constant in CRF-treated slices (Fig.3h), suggesting  
311 increased sustained/asynchronous release following evoked release. To further explore the effect of  
312 acute CRF exposure during more demanding periods of SC input activity, we performed train  
313 stimulations and analyzed both the synchronous peak amplitude and the total cumulative evoked  
314 charge. We observed decreased synaptic fatigue during 10Hz train stimulations (Fig.3i) and an  
315 almost 2-fold increase in the absolute total cumulative charge after CRF treatment (Fig.3j). Together,  
316 these observations suggest that CRF changes presynaptic function, ultimately resulting in enhanced  
317 synaptic reliability.

318 To determine if CRF indeed affects the number of mature/functional synaptic contacts (as suggested  
319 by mEPSC frequency and changes in spines), we stimulated SC inputs and consecutively recorded  
320 AMPA- and NMDA-receptor mediated evoked EPSCs (-60 mV and +40 mV respectively, Fig.3k-n).  
321 CRF-treatment induced a significant increase in AMPA component, both amplitude and total charge  
322 (Fig.3l, o), while NMDA amplitude was unaltered. Consequently, CRF increased the AMPA/NMDA  
323 ratio suggesting a shift towards mature/functional synaptic connections, in line with our spine  
324 analysis data.

325 To explore the long-term effects of CRF on synaptic plasticity and network function, we examined  
326 long-term depression (LTD) and long-term potentiation (LTP) of the SC pathway onto CA1 PCs,  
327 using multi-electrode array (MEA) extracellular field potential recordings (field excitatory  
328 postsynaptic potentials, fEPSPs) (Fig.4). In the cerebellum, LTD induction requires CRF (57), but  
329 this CRF-dependency of LTD generation has not been reported in the hippocampus (58–60). First,  
330 we confirmed that - in our hands - we were able to induce substantial LTD and subsequently if this  
331 plasticity paradigm was reversible, using a consecutive LTP induction on the same acute slices  
332 (Fig.4a). Next, we investigated the effect of acute CRF application on baseline fEPSP amplitude and  
333 subsequently on either LTD or LTP in separate experiments (Fig.4b-e). During CRF application (15  
334 minutes, indicated with “15’ CRF” (Fig.4b,e,h) we observed a clear increase in fEPSP amplitude,  
335 likely representing the short-term increase in synaptic function/reliability described above. This  
336 increase in fEPSP was transient and after CRF wash out, the amplitude returned to baseline, as  
337 previously described (27). Intriguingly, CRF treatment significantly enhanced LTD and LTP induction  
338 (Fig.4c,e), seemingly increasing the spectrum and/or sensitivity of long-term plasticity mechanisms.  
339 To determine the involvement of CRF-Rs in enhancing LTP, we combined application of the CRF-

340 receptor antagonists NBI and aSvq with LTP induction. By themselves, these blockers did not affect  
341 baseline fEPSP amplitudes or LTP induction (Fig.4f). Combined with CRF treatment, blocking either  
342 of the two CRF-Rs did not inhibit CRF-induced enhancement of LTP (Fig.4h,i). However, combining  
343 both blockers abolished the acute CRF-dependent LTP enhancement, indicating that activation of  
344 either receptor is sufficient for this form of plasticity.

### 345 ***Acute CRF exposure leads to ultrastructural alterations of synapses***

346 To further scrutinize the short-term effects of CRF on synaptic structure and organization, we  
347 performed ultrastructural electron microscopy (EM) analysis on hippocampal *ex vivo* acute slices,  
348 focusing on synaptic connections on CA1 PCs in the stratum radiatum (SR), the layer Schaffer  
349 collateral synapses are predominantly located Fig.5, Sup.Video2,3).

350 CRF did not affect presynaptic bouton area (Fig.5a,b). However, we did observe an increase in  
351 postsynaptic compartment size (Fig.5c), the number of synapses per area unit (Fig.5d), and number  
352 of single presynaptic terminals innervating multiple spines (Fig.5e). To investigate whether CRF  
353 induces structural changes within presynaptic terminals, we analyzed the number and localization  
354 of synaptic vesicles. Indeed, CRF increases the total number of vesicles per synapse area and in  
355 addition repolarizes these vesicles towards the release sites, resulting in more vesicles within 30 nm  
356 from active zone (AZ))(Fig.5f,g).

357 To evaluate the spatial relationship between AZ and post-synaptic density (PSD), we stained slices  
358 with PTA, which highlights macromolecular complexes of AZ/PSD in the synapse (61,62). We  
359 focused on asymmetric synapses at the CA1-SR, where secondary and tertiary dendrites of PCs are  
360 located and SC synapses are predominantly located (Fig.5h-k). CRF induced a significant increase  
361 in the number PSDs (corrected for postsynaptic terminal area) and in the length of AZ, without  
362 alterations in PSD length. These findings prompted us to investigate the alignment between the AZ  
363 and PSD (Fig.5l). In a “matching” synapse, the size of the AZ and PSD are comparable to each other  
364 (Fig.5l, top), whereas in “mismatched” synapses the AZ is smaller (Fig.5l, bottom). Using this  
365 approach, we found CRF significantly increased matching between AZ and PSD length (Fig.5m).To  
366 further examine synapse matching, we utilized FIB-SEM based imaging, to allow a more detailed  
367 three-dimensional analysis of synapse ultrastructure (Fig.5n-q, Sup.Video2,3). The 3D-  
368 reconstructed spatial organization of AZ-PSD complexes confirmed a CRF-induced increase in AZ  
369 surface but also showed the previously missed increase in PSD size. In addition, we confirmed that  
370 CRF signaling facilitated AZ-PSD matching (Fig.5n,q).

## 371 **Discussion**

372 Acute stress has a diverse range of beneficial effects on brain function (63,64) and multiple studies  
373 have demonstrated the involvement of CRF as a central regulator in this adaptive process (12,65–  
374 68). However, the acute role of CRF as a local neuromodulator in structural and functional synaptic  
375 plasticity has not been investigated extensively. Here, we provide detailed insights into the acute

376 role of CRF as a local neuropeptide in acute stress. Our research shows that the structural and  
377 functional consequences of acute stress paradigms can be recapitulated both *in vivo and ex vivo*,  
378 using short-term application of physiologically relevant CRF concentrations (8)

379 CRF treatment (injected *in vivo* or applied to acute slices *ex vivo*) resulted in similar structural  
380 adaptations as observed during acute stress paradigms, suggesting a prominent role of CRF in  
381 regulating physiological responses to acute stress. Short-term CRF treatment resulted in rapid  
382 structural and functional adaptations, leading to an overall increase in functional synaptic contacts.  
383 In short, we showed that CRF 1) increased spine density and maturation, 2) increased synapse  
384 number and size, 3) revised synaptic vesicle organization towards release sites, 4) enhanced  
385 matching of synaptic contact, 5) increased synaptic efficacy and 6) enhanced the functional range  
386 of long-term plasticity. Systemically released stress hormones likely cannot be involved in the direct  
387 effects that we found after acute stress and CRF application, since these have been reported to  
388 reach brain tissue well after the structural and functional changes we describe here (51,52).  
389 However, there probably is a temporal integration of immediate (initiated by the local release of  
390 neuromodulators) and delayed (through systemically derived hormones) stress responses within  
391 brain regions. Our *in vivo* data showed an upregulation of immediate early gene *crh* and *cfos mRNA*  
392 expression (Fig.1i,j) after acute stress, indicating responses likely also involve widespread long-term  
393 changes in neuronal function. In addition, our *ex vivo* results confirm this local response by treatment  
394 of CRF and absence of hormonal response. Together, our findings indicate a prominent role of locally  
395 released CRF during the immediate phase of acute stress, modulating synaptic input in the CA1  
396 PCs.

397 Activation of CRF-R1 is required for CRF-induced changes in spine density and maturation, while  
398 CRF-R2s are not (Fig.2b,c). Since CRF-R1 activation is also a prerequisite for inducing *cfos*  
399 expression (69,70), the observed structural changes might depend on processes downstream of  
400 *cfos* signaling. Comparably, the transient increase in fEPSP amplitude during CRF applications  
401 requires CRF-R1 activation. Since the observed CRF-R1-dependent structural changes would  
402 presumably persist after CRF exposure, it seems more likely that the reversible CRF-R1 dependent  
403 increase in fEPSP responses is due to a transient increase in presynaptic efficacy via CRF-R1s  
404 expressed in the presynaptic compartment (71,72). Indeed, both evoked and spontaneous synaptic  
405 input in CA1 PCs increased while applying CRF indicating an immediate effect of CRF on synapse  
406 function. In contrast, either CRF-R1 or CRF-R2 activation (or both) was sufficient to enhance long-  
407 term plasticity (Fig.4h,-i). Our data supports CRF as a positive regulator of synaptic transmission, in  
408 agreement with other reports describing CRF generally as a facilitator of excitatory  
409 neurotransmission throughout different brain regions (31,55,73,74).

410 PPF is an activity dependent increase in pre-synaptic release probability due to accumulation of  
411 presynaptic  $Ca^{2+}$ . CRF increases paired pulse facilitation (PPF) of the Schaffer Collateral synapses  
412 (Fig.3g), likely due to the relocation of synaptic vesicles towards the active zone (Fig.5g) which would

413 increase either the size or the replenishment rate of the release pool. The CRF-induced increase in  
414 synaptic vesicle number and redistribution towards the active zone is expected to also affect synaptic  
415 release efficacy during sustained periods of activity, which is indeed what we observed during train  
416 stimulations (Fig.3i). EM confirmed the increase in the docking pool of vesicles by CRF (Fig.5f,g),  
417 thereby providing evidence of the mechanism of action of CRF in acute stress response by  
418 enhancing structural architecture and functional properties of the synaptic network.

419 In contrast to CRF-R1, there is still much debate over the presence of CRF-R2 in the rodent  
420 hippocampus (7,10,75–79). Some reports confirm expression of CRF-R2 (71,75,76,78), while others  
421 disregard its presence (9,80,81). CRF-R2 mRNA has been reported throughout the hippocampal  
422 formation, albeit in lower amounts compared to CRF-R1 (71,75). Potentially the presence of different  
423 isoforms of CRF-R2 (full-length and truncated) underlies these contradicting reports (36). In addition,  
424 the two receptors are also known to have different kinetics. While CRF-R1 is activated fast in acute  
425 stages, studies in knock-out mice suggest that CRF signaling via CRF-R2 has a slower kinetic  
426 (4,82,83). Indeed, CRF-receptors were insufficient to establish the acute CRF-induced enhancement  
427 of synaptic efficacy (as measured by a transient increase in fEPSPs) but consecutive LTP induction  
428 was enhanced, in line with a delayed role of CRF-R2 in acute CRF signaling.

429 In conclusion, we report that acute CRF signaling in CA1 PCs involves a complicated interplay of  
430 morphological and functional synaptic adaptations, which culminate in enhancing both short- and  
431 long-term responsiveness of the underlying neuronal network, potentially affecting hippocampus  
432 dependent learning strategies during short stressful events.

## Acknowledgements

We thank Drs. Matthew Holt, Linette Lim, and Bart De Strooper (VIB-KU Leuven) for critical reading of the manuscript, VIB BioImaging Core – Leuven and Ghent for help with imaging, Eline Creemers for help with electrophysiology. We thank Drs. Karl Farrow, Vincent Bonin (NERF) for the Thy1-GCaMP6s mouse line, the behavioral core (mINT-KU Leuven) Dr.Zsuzsanna Callaerts-Vegh. We thank Dr. Katarzyna Marta Zoltowska and Dr. Lucía Chávez-Gutiérrez for assistance with the ELISA experiment. DV is supported by a Methusalem grant from KU Leuven and the Flemish Government awarded to Dr. Bart De Strooper (METH/14/07). FWO, Image Storage Platform for Analysis Management and Mining project (ISPAMM; AKUL/13/39).

## Author contributions

N.G., D.V., and V.R. conceived the project and N.G. and D.V. designed the experiments. D.V., K.V., P.B. and K.Z. performed experiments. D.V., N.G. and K.V. analyzed the data. K.W. designed experiments involving electrophysiology, contributed reagents, materials, and analysis tools. L.D.G. and L.M. provided the Thy1-YFP-H mouse line. N.G., D.V. and K.W. wrote the paper.

## **Funding and disclosure**

DV is supported by a Methusalem grant from KU Leuven and the Flemish Government awarded to Dr. Bart De Strooper (METH/14/07). FWO, Image Storage Platform for Analysis Management and Mining project (ISPAMM; AKUL/13/39). All authors reviewed and confirmed the manuscript.

## **Competing interests**

All authors declare that they have no competing financial interests or potential conflicts of interest.

## References

1. Selye H. Streß-syndrome. A syndrome produced by diverse nocuous agents. *Nature*. 1936;
2. Selye H. Stress and the general adaptation syndrome. *Br Med J*. 1950;
3. Selye H. Confusion and controversy in the stress field. *J Human Stress*. 1975;
4. Joëls M, Baram TZ. The neuro-symphony of stress. *Nat Rev Neurosci*. 2009 Jun 2;10(6):459–66.
5. McEwen BS, Gianaros PJ. Central role of the brain in stress and adaptation: Links to socioeconomic status, health, and disease. *Ann N Y Acad Sci*. 2010;1186:190–222.
6. Chrousos GP. Stress and disorders of the stress system. Vol. 5, *Nature Reviews Endocrinology*. 2009.
7. Maras PM, Baram TZ. Sculpting the hippocampus from within: Stress, spines, and CRH. *Trends Neurosci*. 2012;35(5):315–24.
8. Deussing JM, Chen AA. The Corticotropin-Releasing Factor Family: Physiology of the Stress Response. *Physiol Rev*. 2018;98:2225–86.
9. Henckens MJAG, Deussing JM, Chen A. Region-specific roles of the corticotropin-releasing factor-urocortin system in stress. *Nat Rev Neurosci*. 2016;17(10):636–51.
10. Dedic N, Deussing AC and JM. The CRF Family of Neuropeptides and their Receptors - Mediators of the Central Stress Response. *Curr Mol Pharmacol*. 2017;10:1–28.
11. Vandael D, Goukko NVNV. Corticotropin releasing factor-binding protein (CRF-BP) as a potential new therapeutic target in Alzheimer’s disease and stress disorders. *Transl Psychiatry*. 2019 Oct 22;9(1):272.
12. Chen Y, Andres AL, Frotscher M, Baram TZ. Tuning synaptic transmission in the hippocampus by stress: the CRH system. *Front Cell Neurosci*. 2012;6.
13. Gunn BG, Sanchez GA, Lynch G, Baram TZ, Chen Y. Hyper-diversity of CRH interneurons in mouse hippocampus. *Brain Struct Funct*. 2019;224(2):583–98.
14. Chen Y, Brunson KL, Müller MB, Cariaga W, Baram TZ. Immunocytochemical distribution of corticotropin-releasing hormone receptor type-1 (CRF1)-like immunoreactivity in the mouse brain: Light microscopy analysis using an antibody directed against the C-terminus. *J Comp Neurol*. 2000;
15. Refojo D, Echenique C, Müller MB, Reul JMHM, Deussing JM, Wurst W, et al. Corticotropin-releasing hormone activates ERK1/2 MAPK in specific brain areas. *Proc Natl Acad Sci U S*



- A. 2005;
16. McEwen BS, Gianaros PJ. Stress- and Allostasis-Induced Brain Plasticity. *Annu Rev Med.* 2010;62(1):431–45.
  17. Zoladz PR, Diamond DM. Linear and non-linear dose-response functions reveal a hormetic relationship between stress and learning. *Dose-Response.* 2009;7(2):132–48.
  18. Schwabe L, Joëls M, Roozendaal B, Wolf OT, Oitzl MS. Stress effects on memory: An update and integration. *Neurosci Biobehav Rev.* 2012;36(7):1740–9.
  19. Krugers HJ, Lucassen PJ, Karst H, Joëls M. Chronic stress effects on hippocampal structure and synaptic function: Relevance for depression and normalization by anti-glucocorticoid treatment. *Front Synaptic Neurosci.* 2010;(JUL).
  20. De Quervain DJF, Roozendaal B, McGaugh JL. Stress and glucocorticoids impair retrieval of long-term spatial memory. *Nature.* 1998;
  21. Justice NJ. The relationship between stress and Alzheimer’s disease. *Neurobiol Stress.* 2018;8:127–33.
  22. K. B, K. S, M.-È. T. Chronic stress as a risk factor for Alzheimer’s disease: Roles of microglia-mediated synaptic remodeling, inflammation, and oxidative stress. *Neurobiol Stress.* 2018;9(February):9–21.
  23. Gounko N V., Swinny JD, Kalicharan D, Jafari S, Corteen N, Seifi M, et al. Corticotropin-releasing factor and urocortin regulate spine and synapse formation: Structural basis for stress-induced neuronal remodeling and pathology. *Mol Psychiatry.* 2013;18(1):86–92.
  24. Chen Y, Kramár EA, Chen LY, Babayan AH, Andres AL, Gall CM, et al. Impairment of synaptic plasticity by the stress mediator CRH involves selective destruction of thin dendritic spines via RhoA signaling. *Mol Psychiatry.* 2013;18(4):485–96.
  25. Joëls M, Fernandez G, Roozendaal B. Stress and emotional memory: A matter of timing. *Trends Cogn Sci.* 2011;15(6):280–8.
  26. Swinny JD, Metzger F, Ijkema-Paassen J, Gounko N V., Gramsbergen A, Van Der Want JJJ. Corticotropin-releasing factor and urocortin differentially modulate rat Purkinje cell dendritic outgrowth and differentiation in vitro. *Eur J Neurosci.* 2004;19(7):1749–58.
  27. Blank T, Nijholt I, Eckart K, Spiess J. Priming of Long-Term Potentiation in Mouse Hippocampus by Corticotropin-Releasing Factor and Acute Stress: Implications for Hippocampus-Dependent Learning. *J Neurosci.* 2002;22(9):3788–94.
  28. Rebaudo R, Melani R, Balestrino M, Izvarina N. Electrophysiological effects of sustained delivery of CRF and its receptor agonists in hippocampal slices. *Brain Res.* 2001;

29. Chen Y, Rex CS, Rice CJ, Dubé CM, Gall CM, Lynch G, et al. Correlated memory defects and hippocampal dendritic spine loss after acute stress involve corticotropin-releasing hormone signaling. *Proc Natl Acad Sci U S A*. 2010;107(29):13123–8.
30. Chen Y, Bender RA, Brunson KL, Pomper JK, Grigoriadis DE, Wurst W, et al. Modulation of dendritic differentiation by corticotropin-releasing factor in the developing hippocampus. *Proc Natl Acad Sci U S A*. 2004;
31. Aldenhoff JB, Gruol DL, Rivier J, Vale W, Siggins GR. Corticotropin releasing factor decreases postburst hyperpolarizations and excites hippocampal neurons. *Science* (80- ). 1983;221(4613):875–7.
32. Haug T, Storm JF. Protein kinase A mediates the modulation of the slow Ca<sup>2+</sup>-dependent K<sup>+</sup> current, I(sAHP), by the neuropeptides CRF, VIP, and CGRP in hippocampal pyramidal neurons. *J Neurophysiol*. 2000;
33. Bali A, Jaggi AS. Electric foot shock stress: A useful tool in neuropsychiatric studies. *Rev Neurosci*. 2015;26(6):655–77.
34. Clark SM, Sand J, Francis TC, Nagaraju A, Michael KC, Keegan AD, et al. Immune status influences fear and anxiety responses in mice after acute stress exposure. *Brain Behav Immun*. 2014;38:192–201.
35. Wu YP, Gao HY, Ouyang SH, Kurihara H, He RR, Li YF. Predator stress-induced depression is associated with inhibition of hippocampal neurogenesis in adult male mice. *Neural Regen Res*. 2019;
36. Sterley TL, Baimoukhametova D, Füzesi T, Zurek AA, Daviu N, Rasiah NP, et al. Social transmission and buffering of synaptic changes after stress. *Nat Neurosci*. 2018;21(3):393–403.
37. Wilcock DM, DiCarlo G, Henderson D, Jackson J, Clarke K, Ugen KE, et al. Intracranially administered anti-A $\beta$  antibodies reduce  $\beta$ -amyloid deposition by mechanisms both independent of and associated with microglial activation. *J Neurosci*. 2003;
38. Belevich I, Joensuu M, Kumar D, Vihinen H, Jokitalo E. Microscopy Image Browser: A Platform for Segmentation and Analysis of Multidimensional Datasets. *PLoS Biol*. 2016;14(1).
39. Condomitti G, Wierda KD, Schroeder A, Rubio SE, Vennekens KM, Orlandi C, et al. An Input-Specific Orphan Receptor GPR158-HSPG Interaction Organizes Hippocampal Mossy Fiber-CA3 Synapses. *Neuron*. 2018;100(1):201-215.e9.
40. Pastoll H, White M, Nolan M. Preparation of parasagittal slices for the investigation of dorsal-ventral organization of the rodent medial entorhinal cortex. *J Vis Exp*. 2012;(61).

41. Largo-Barrientos P, Apóstolo N, Creemers E, Callaerts-Vegh Z, Swerts J, Davies C, et al. Lowering Synaptogyrin-3 expression rescues Tau-induced memory defects and synaptic loss in the presence of microglial activation. *Neuron*. 2021;
42. Bessa JM, Ferreira D, Melo I, Marques F, Cerqueira JJ, Palha JA, et al. The mood-improving actions of antidepressants do not depend on neurogenesis but are associated with neuronal remodeling. *Mol Psychiatry*. 2009;14(8):764–73.
43. Leuner B, Shors TJ. Stress, anxiety, and dendritic spines: What are the connections? *Neuroscience*. 2013;251:108–19.
44. Sandi C, Davies HA, Cordero MI, Rodriguez JJ, Popov VI, Stewart MG. Rapid reversal of stress induced loss of synapses in CA3 of rat hippocampus following water maze training. *Eur J Neurosci*. 2003;17(11):2447–56.
45. Magariños AM, García Verdugo JM, McEwen BS. Chronic stress alters synaptic terminal structure in hippocampus. *Proc Natl Acad Sci U S A*. 1997;94(25):14002–8.
46. Gong S, Miao YL, Jiao GZ, Sun MJ, Li H, Lin J, et al. Dynamics and correlation of serum cortisol and corticosterone under different physiological or stressful conditions in mice. *PLoS One*. 2015;10(2).
47. McGill BE, Bundle SF, Yaylaoglu MB, Carson JP, Thaller C, Zoghbi HY. Enhanced anxiety and stress-induced corticosterone release are associated with increased Crh expression in a mouse model of Rett syndrome. *Proc Natl Acad Sci U S A*. 2006;103(48).
48. McClennen SJ, Cortright DN, Seasholtz AF. Regulation of pituitary corticotropin-releasing hormone-binding protein messenger ribonucleic acid levels by restraint stress and adrenalectomy. *Endocrinology*. 1998;139(11):4435–41.
49. Hering H, Sheng M. Dendritic spines: structure, dynamics and regulation. *Nat Rev Neurosci*. 2001;
50. Segal M. Dendritic spines and long-term plasticity. *Nat Rev Neurosci*. 2005 Apr;6(4):277–84.
51. Droste SK, De Groote L, Atkinson HC, Lightman SL, Reul JM, Linthorst ACE. Corticosterone levels in the brain show a distinct ultradian rhythm but a delayed response to forced swim stress. *Endocrinology*. 2008;149(7):3244–53.
52. Qian X, Droste SK, Gutiérrez-Mecinas M, Collins A, Kersanté F, Reul JM, et al. A rapid release of corticosteroid-binding globulin from the liver restrains the glucocorticoid hormone response to acute stress. *Endocrinology*. 2011;152(10):3738–48.
53. Salvatore M, Wiersielis KR, Luz S, Waxler DE, Bhatnagar S, Bangasser DA. Sex differences in circuits activated by corticotropin releasing factor in rats. *Horm Behav*. 2018;

54. Boutillier AL, Sassone-Corsi P, Loeffler JP. The Protooncogene c-fos is induced by corticotropin-releasing factor and stimulates proopiomelanocortin gene transcription in pituitary cells. *Mol Endocrinol*. 1991;
55. Dedic N, Kühne C, Gomes KS, Hartmann J, Ressler KJ, Schmidt M V., et al. Deletion of CRH From GABAergic Forebrain Neurons Promotes Stress Resilience and Dampens Stress-Induced Changes in Neuronal Activity. *Front Neurosci*. 2019;
56. Henckens MJAG, Printz Y, Shamgar U, Dine J, Lebow M, Drori Y, et al. CRF receptor type 2 neurons in the posterior bed nucleus of the stria terminalis critically contribute to stress recovery. *Mol Psychiatry*. 2017 Dec 23;22(12):1691–700.
57. Miyata M, Okada D, Hashimoto K, Kano M, Ito M. Corticotropin-releasing factor plays a permissive role in cerebellar long-term depression. *Neuron*. 1999;22(4):763–75.
58. Tak PW, Howland JG, Robillard JM, Ge Y, Yu W, Titterness AK, et al. Hippocampal long-term depression mediates acute stress-induced spatial memory retrieval impairment. *Proc Natl Acad Sci U S A*. 2007;104(27):11471–6.
59. Sumi T, Harada K. Mechanism underlying hippocampal long-term potentiation and depression based on competition between endocytosis and exocytosis of AMPA receptors. *Sci Rep*. 2020;
60. Lemon N, Manahan-Vaughan D. Dopamine D1/D5 receptors contribute to de novo hippocampal LTD mediated by novel spatial exploration or locus coeruleus activity. *Cereb Cortex*. 2012;22(9):2131–8.
61. GRAY EG. Problems of Interpreting the Fine Structure of Vertebrate and Invertebrate Synapses. In 1966. p. 139–70.
62. Bloom FE, Aghajanian GK. Fine structural and cytochemical analysis of the staining of synaptic junctions with phosphotungstic acid. *J Ultrastructure Res*. 1968;
63. Yuen EY, Liu W, Karatsoreos IN, Feng J, McEwen BS, Yan Z. Acute stress enhances glutamatergic transmission in prefrontal cortex and facilitates working memory. *Proc Natl Acad Sci U S A*. 2009;
64. Parihar VK, Hattiangady B, Kuruba R, Shuai B, Shetty AK. Predictable chronic mild stress improves mood, hippocampal neurogenesis and memory. *Mol Psychiatry*. 2011;
65. Adzic M, Djordjevic J, Djordjevic A, Niciforovic A, Demonacos C, Radojicic M, et al. Acute or chronic stress induce cell compartment-specific phosphorylation of glucocorticoid receptor and alter its transcriptional activity in Wistar rat brain. *J Endocrinol*. 2009;202(1):87–97.
66. Chen Y, Brunson KL, Adelman G, Bender RA, Frotscher M, Baram TZ. Hippocampal

- corticotropin releasing hormone: Pre- and postsynaptic location and release by stress. *Neuroscience*. 2004;126(3):533–40.
67. Aguilar-Valles A, Sánchez E, De Gortari P, Balderas I, Ramírez-Amaya V, Bermúdez-Rattoni F, et al. Analysis of the stress response in rats trained in the water-maze: Differential expression of corticotropin-releasing hormone, CRH-R1, glucocorticoid receptors and brain-derived neurotrophic factor in limbic regions. *Neuroendocrinology*. 2006;82(5–6):306–19.
  68. Jiang Z, Rajamanickam S, Justice NJ. CRF signaling between neurons in the paraventricular nucleus of the hypothalamus (PVN) coordinates stress responses. *Neurobiol Stress*. 2019 Nov;11:100192.
  69. Doyon C, Samson P, Lalonde J, Richard D. Effects of the CRF1 receptor antagonist SSR125543 on energy balance and food deprivation-induced neuronal activation in obese Zucker rats. *J Endocrinol*. 2007;
  70. Skórzewska A, Bidziński A, Hamed A, Lehner M, Turzyńska D, Sobolewska A, et al. The influence of CRF and  $\alpha$ -helical CRF(9-41) on rat fear responses, c-Fos and CRF expression, and concentration of amino acids in brain structures. *Horm Behav*. 2008;
  71. Gunn BG, Cox CD, Chen Y, Frotscher M, Gall CM, Baram TZ, et al. The endogenous stress hormone CRH modulates excitatory transmission and network physiology in hippocampus. *Cereb Cortex*. 2017;
  72. Bajo M, Cruz MT, Siggins GR, Messing R, Roberto M. Protein kinase C epsilon mediation of CRF- and ethanol-induced GABA release in central amygdala. *Proc Natl Acad Sci U S A*. 2008;105(24):8410–5.
  73. Hollrigel GS, Chen K, Baram TZ, Soltesz I. The pro-convulsant actions of corticotropin-releasing hormone in the hippocampus of infant rats. *Neuroscience*. 1998;84(1):71–9.
  74. Giesbrecht CJ, Mackay JP, Silveira HB, Urban JH, Colmers WF. Countervailing modulation of Ihby neuropeptide Y and corticotrophin-releasing factor in basolateral amygdala as a possible mechanism for their effects on stress-related behaviors. *J Neurosci*. 2010;
  75. Van Pett K, Viau V, Bittencourt JC, Chan RKW, Li HY, Arias C, et al. Distribution of mRNAs encoding CRF receptors in brain and pituitary of rat and mouse. *J Comp Neurol*. 2000;
  76. Hiroi N, Wong ML, Licinio J, Park C, Young M, Gold PW, et al. Expression of corticotropin releasing hormone receptors type I and type II mRNA in suicide victims and controls. *Mol Psychiatry*. 2001;
  77. Gunn BG, Baram TZ. Stress and Seizures: Space, Time and Hippocampal Circuits. *Trends Neurosci*. 2017 Nov;40(11):667–79.

78. Carboni L, Romoli B, Bate ST, Romualdi P, Zoli M. Increased expression of CRF and CRF-receptors in dorsal striatum, hippocampus, and prefrontal cortex after the development of nicotine sensitization in rats. *Drug Alcohol Depend.* 2018;
79. Smith GW, Aubry J-MM, Dellu F, Contarino A, Bilezikjian LM, Gold LH, et al. Corticotropin Releasing Factor Receptor 1–Deficient Mice Display Decreased Anxiety, Impaired Stress Response, and Aberrant Neuroendocrine Development. *Neuron.* 1998 Jun;20(6):1093–102.
80. Dedic N, Chen A, Deussing JM. The CRF Family of Neuropeptides and their Receptors - Mediators of the Central Stress Response. *Curr Mol Pharmacol.* 2018;11(1).
81. Bagosi Z, Balangó B, Pintér D, Csabafi K, Jászberényi M, Szabó G, et al. The effects of CRF and urocortins on the hippocampal glutamate release. *Neurochem Int.* 2015;
82. Bale TL, Contarino A, Smith GW, Chan R, Gold LH, Sawchenko PE, et al. Mice deficient for corticotropin-releasing hormone receptor-2 display anxiety-like behaviour and are hypersensitive to stress. *Nat Genet.* 2000;24(4):410–4.
83. Coste SC, Kesterson RA, Heldwein KA, Stevens SL, Heard AD, Hollis JH, et al. Abnormal adaptations to stress and impaired cardiovascular function in mice lacking corticotropin-releasing hormone receptor-2. *Nat Genet.* 2000;

## Figures and figure legends

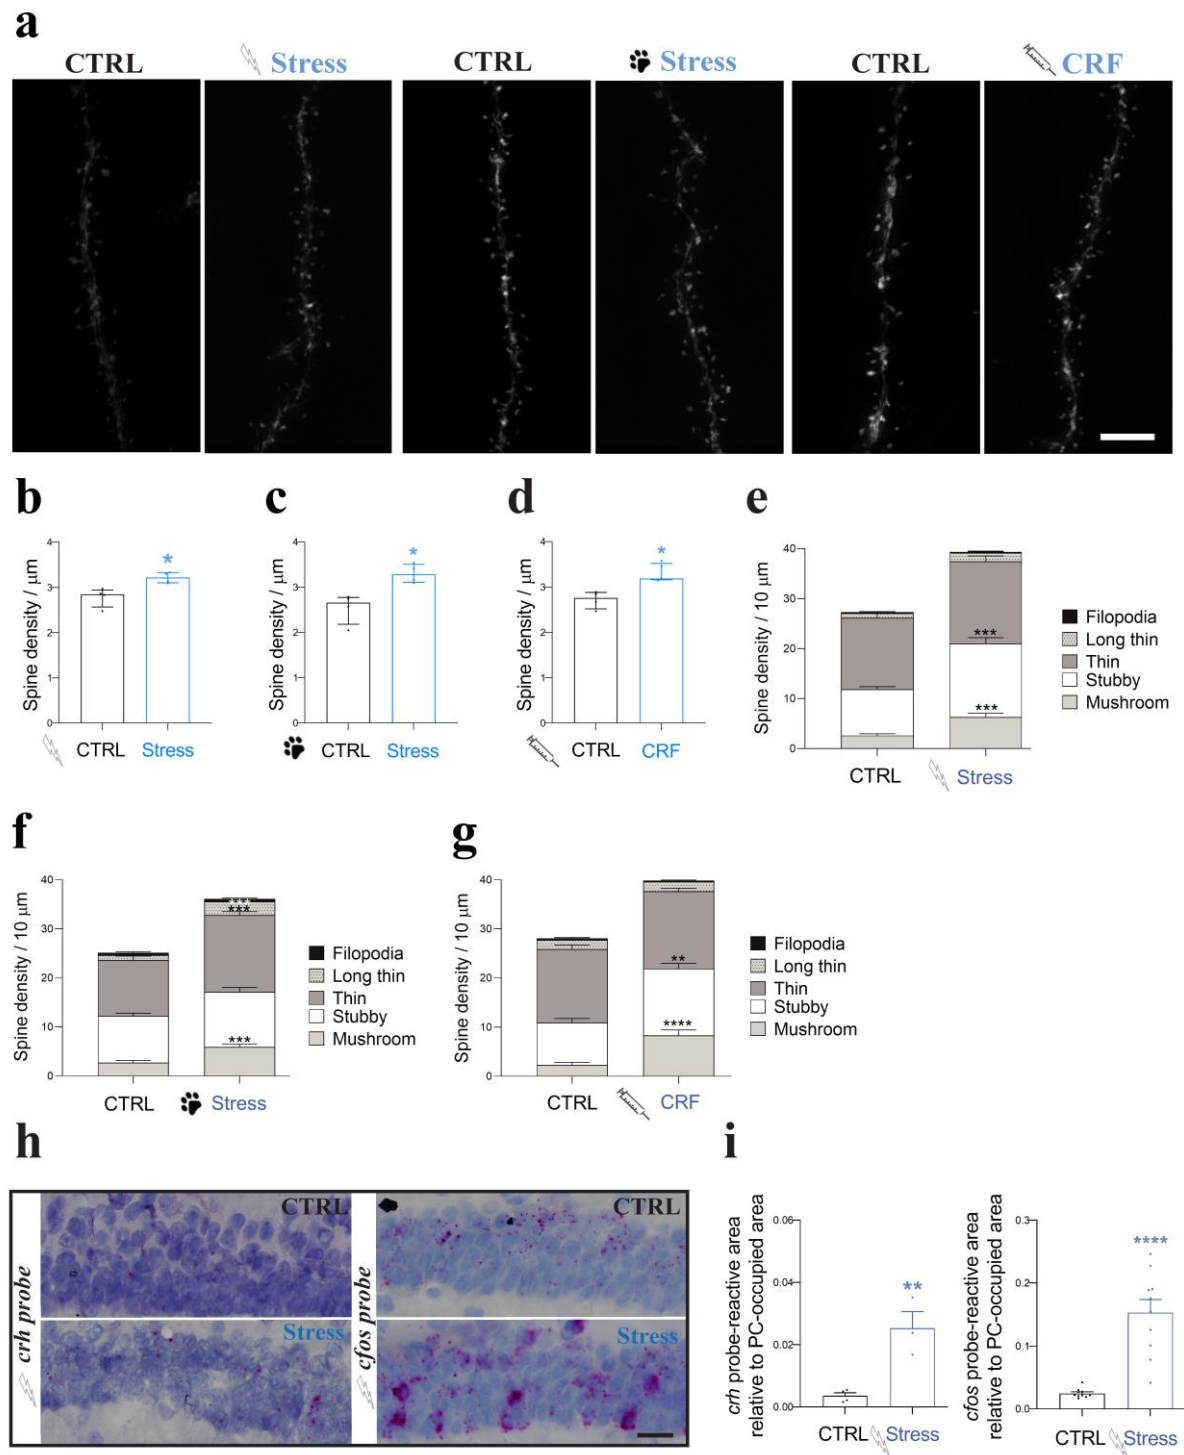

**Figure 1**

**Acute stress and CRF increase spine density in CA1 hippocampus *in vivo*.** (a) Representative images of CA1 PC dendrites from Thy1GFP mice before and after acute stress. Left two images: foot shock (FS) paradigm, middle two images: predator odor (PO) paradigm, right two images: 20 minutes 100nM CRF treatment using stereotactic injections into the hippocampal formation. Scale bar=5 $\mu$ m (b-d) Quantification of spine densities after FS, PO and CRF treatment (shown as median

with IQR, CTRL: N=4, n=34; FS: N=4, n=34; PO: N=4, n=31; acute CRF treatment: N=5, n=34; Mann-Whitney tested (U=0); \* p<0.05). Acute stress paradigms FS (b), PO (c) and acute CRF treatment (d) increase spine density. (e-g) Quantification of spine types. Acute stress paradigms FS (e) (shown as the mean±SEM, CTRL: N=4, n=19; FS: N=5, n=18; multiple t test (filopodia; t ratio=0.6804, long thin; t ratio=2.696, thin; t ratio=1.513, stubby; t ratio=4.728, mushroom; t ratio=4.363). \*\*\*p<0.0001). PO (f) (shown as the mean±SEM, CTRL: N=5, n=18; PO: N=4, n=18; multiple t test filopodia; t ratio=0.2124, long thin; t ratio=4.100, thin; t ratio=4.141, stubby; t ratio=0.9460, mushroom; t ratio=4.868). \*\*\*p<0.0005) and acute CRF treatment (g) (shown as the mean±SEM, CTRL: N=3, n=14; CRF injections: N=3, n=15; multiple t test filopodia; t ratio=0.8867, long thin; t ratio=0.2817, thin; t ratio=0.9384, stubby; t ratio=3.645, mushroom; t ratio=4.784). \*\*p<0.005) promote spine maturation in PCs CA1. (h) FS increases *crh* (left) and *cfos* (right) mRNA expression in CA1 PCs. Scale bar=25µm (i) Quantification of *crh* (left) and *cfos* (right) mRNA expression (shown as the mean±SEM from >3animals; FS CTRL: N=10 sections; FS: N=10; unpaired t-test (t=2.765, df=18). \*p<0.05).



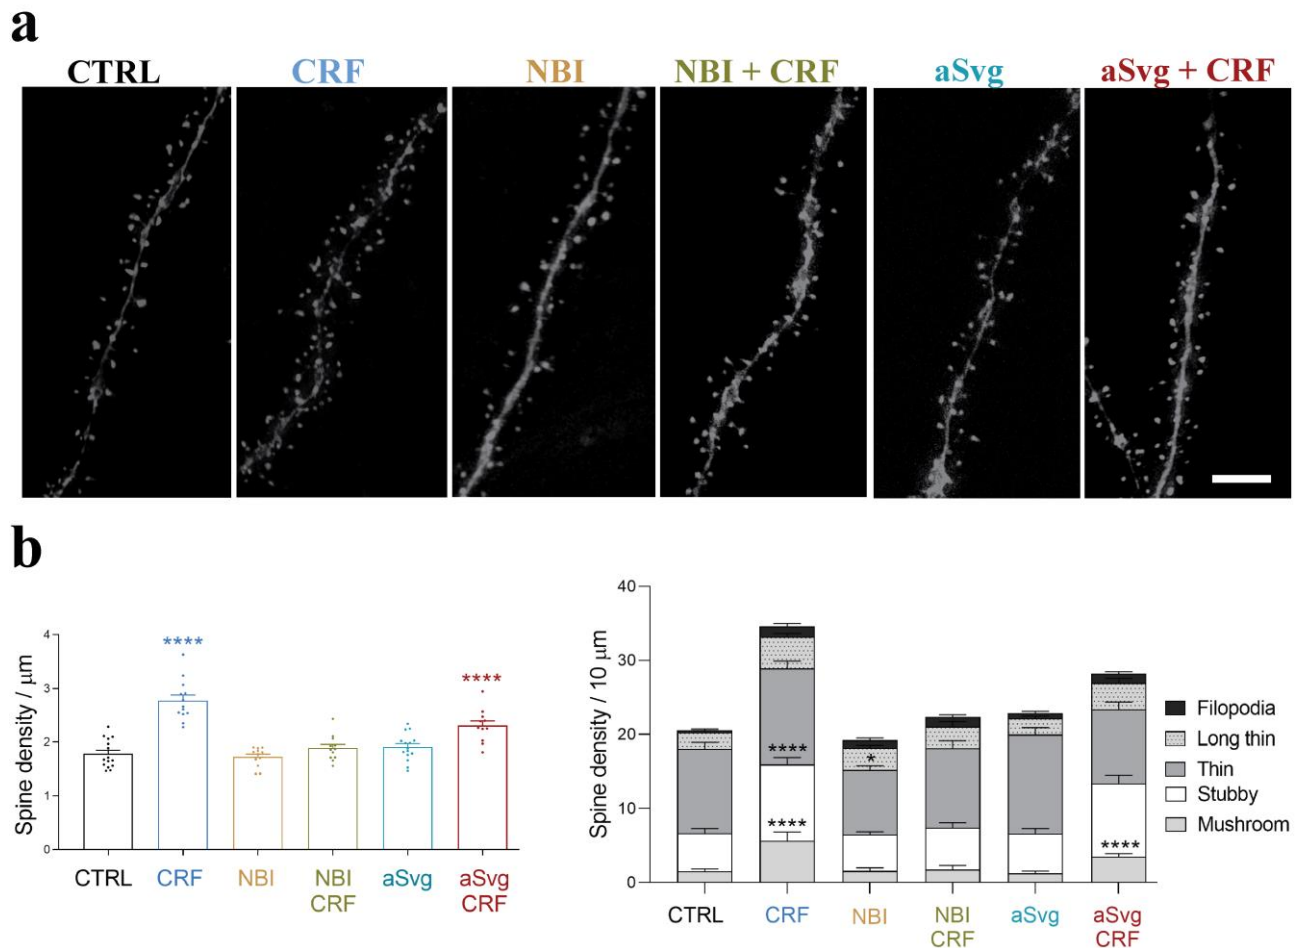

**Figure 2**

**Short-term CRF application increases pyramidal cell spine density and maturation *ex vivo*.**

(a) Spines on CA1 PC dendrites filled with Alexa 568 using: no treatment (CTRL), only 100nM CRF for 20 minutes, selective CRF-R1 antagonist NBI (1.2 $\mu\text{M}$ , NBI), combined NBI and CRF (NBI+CRF), selective CRF-R2 antagonist aSvq (150nM, aSvq) and combined aSvq and CRF (aSvq+CRF) application. Scale bar=5 $\mu\text{m}$ . (b-c) Quantification of (b) spine densities (shown as the mean $\pm$ SEM, CTRL; N=3, n=15; CRF: N=5, n=13; NBI: N=4, n=12; NBI+CRF: N=5, n=12; aSVG: N=5, n=15; aSVG+CRF: N=4, n=9; one-way ANOVA with Dunnett's multiple comparisons test ( $F=21.25$ ). \* $p<0.05$ , \*\*\*\* $p<0.0001$ ), (c) and type (shown as the mean $\pm$ SEM; two-way ANOVA with multiple comparisons ( $F=21.25$ ). \* $p<0.05$ , \*\*\* $p<0.005$ , \*\*\*\* $p<0.0001$ ) using aforementioned conditions.

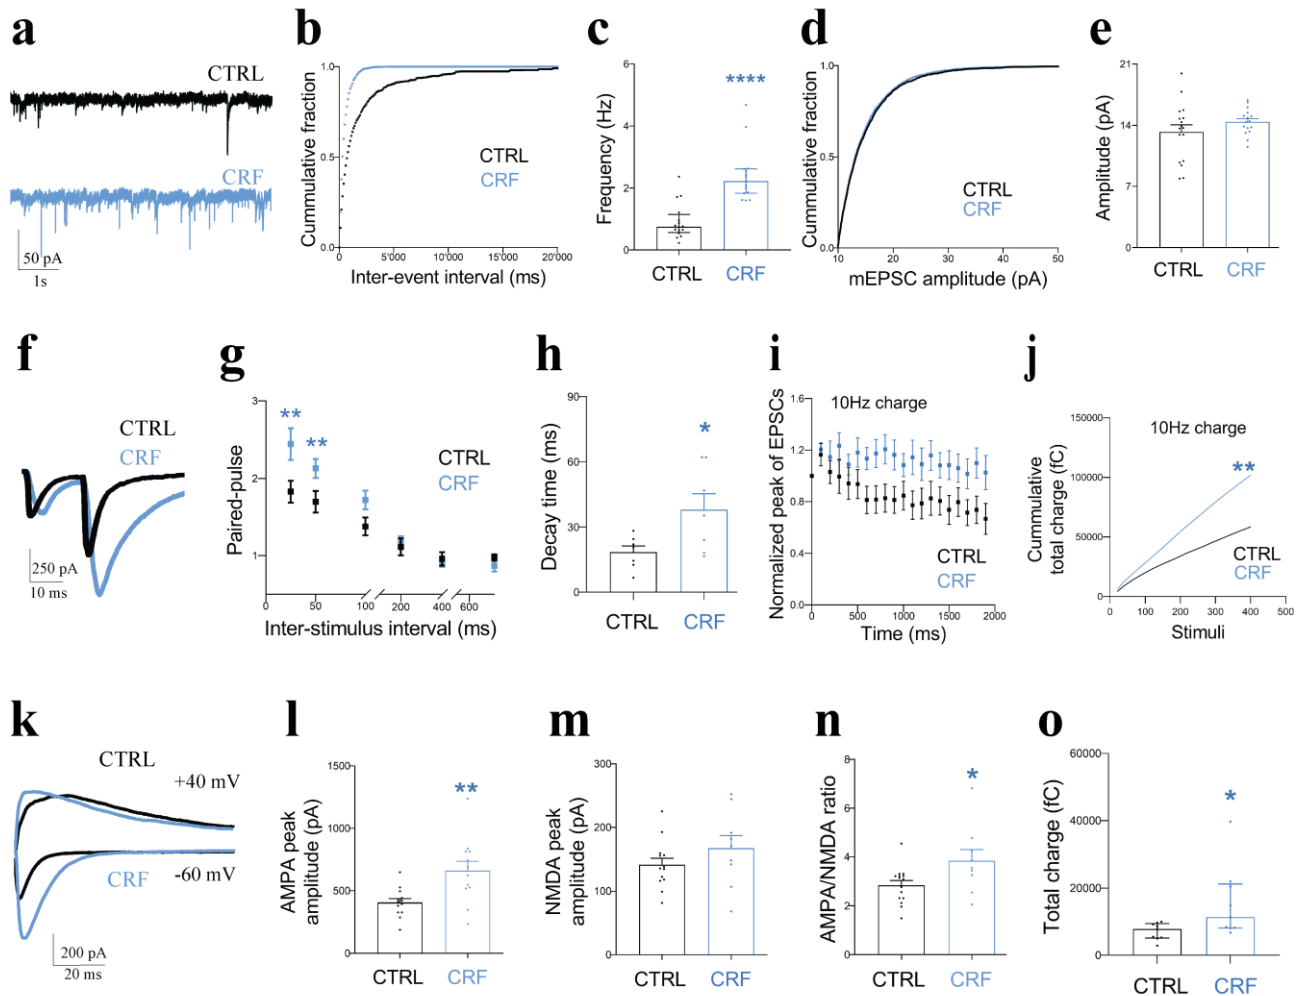

**Figure 3**

**Acute CRF treatment increases synaptic input and synaptic reliability.** (a) mEPSCs recorded in CA1 PCs in control (black) and 20 minutes after 100nM CRF treatment (blue). (b-c) CRF increased mEPSCs frequency (shown median with IQR. CTRL: N=3, n=16; CRF: N=3, n=15; Mann-Whitney test ( $U=15$ ).  $****p<0.0001$ ), but not amplitude (d-e) (shown as the mean $\pm$ SEM. CTRL: N=3, n=17; CRF: N=4, n=16; unpaired t test ( $t=1.267$ ,  $df=31$ ).  $P=0.2147$ ). (f) Stimulation of Schaffer collaterals resulting paired pulse input in recorded CA1 PCs under control (black) and CRF pretreated conditions (blue). (g,h) CRF increased amplitude (increased paired pulse facilitation with 25 and 50 ms inter-stimulation intervals) (g) (shown as the mean $\pm$ SEM. CTRL: N=4, n=15; CRF: N=4, n=16; unpaired t test (for 25ms;  $t=3.406$  and  $df=31$ , for 50ms;  $t=2.835$  and  $df=31$ ).  $**p<0.01$ ) and the decay time (h) (shown as mean $\pm$ SEM. CTRL: N=4, n=15; CRF N=4, n=16; unpaired t test ( $t=3.738$  and  $df=31$ ).  $***p<0.001$ ) of the second evoked EPSC. (i-j) Normalized EPSC amplitude (i) and cumulative total charge released during train stimulation (10 Hz, 200 stimuli) (j) in control (black) and CRF treated (blue) (shown as the median with IQR. CTRL: N=5, n=17; CRF: N=6, n=15; Mann-Whitney test ( $U=58$ ).  $**p<0.01$ ). (k) CRF increased AMPAR-mediated EPSC amplitude at SC-CA synapses ( $V_m=-60$ mV, black) (l) (shown as the mean $\pm$ SEM. CTRL: N=4, n=13; CRF: N=3, n=12; unpaired t test ( $t=3.189$ ,  $df=23$ ).  $**p<0.005$ ), but not NMDAR-mediated EPSC amplitude

( $V_m = +40\text{mV}$ , blue) (m) (mean $\pm$ SEM. CTRL: N=4, n=13; CRF: N=3, n=9; are unpaired t test ( $t=1.257$ ,  $df=20$ ).  $P=0.2234$ ). (n) AMPAR/NMDAR ratio (shown as mean $\pm$ SEM. CTRL: N=4, n=15; CRF: N=3, n=9; unpaired t test ( $t=2.319$ ,  $df=22$ ).  $*p<0.05$ ). (o) CRF increases total charge transfer during AMPAR-mediated EPSCs (shown as median with IQR. CTRL: N=4, n=9; CRF: N=3, n=9; Mann-Whitney test ( $U=17$ ).  $*p<0.05$ ).

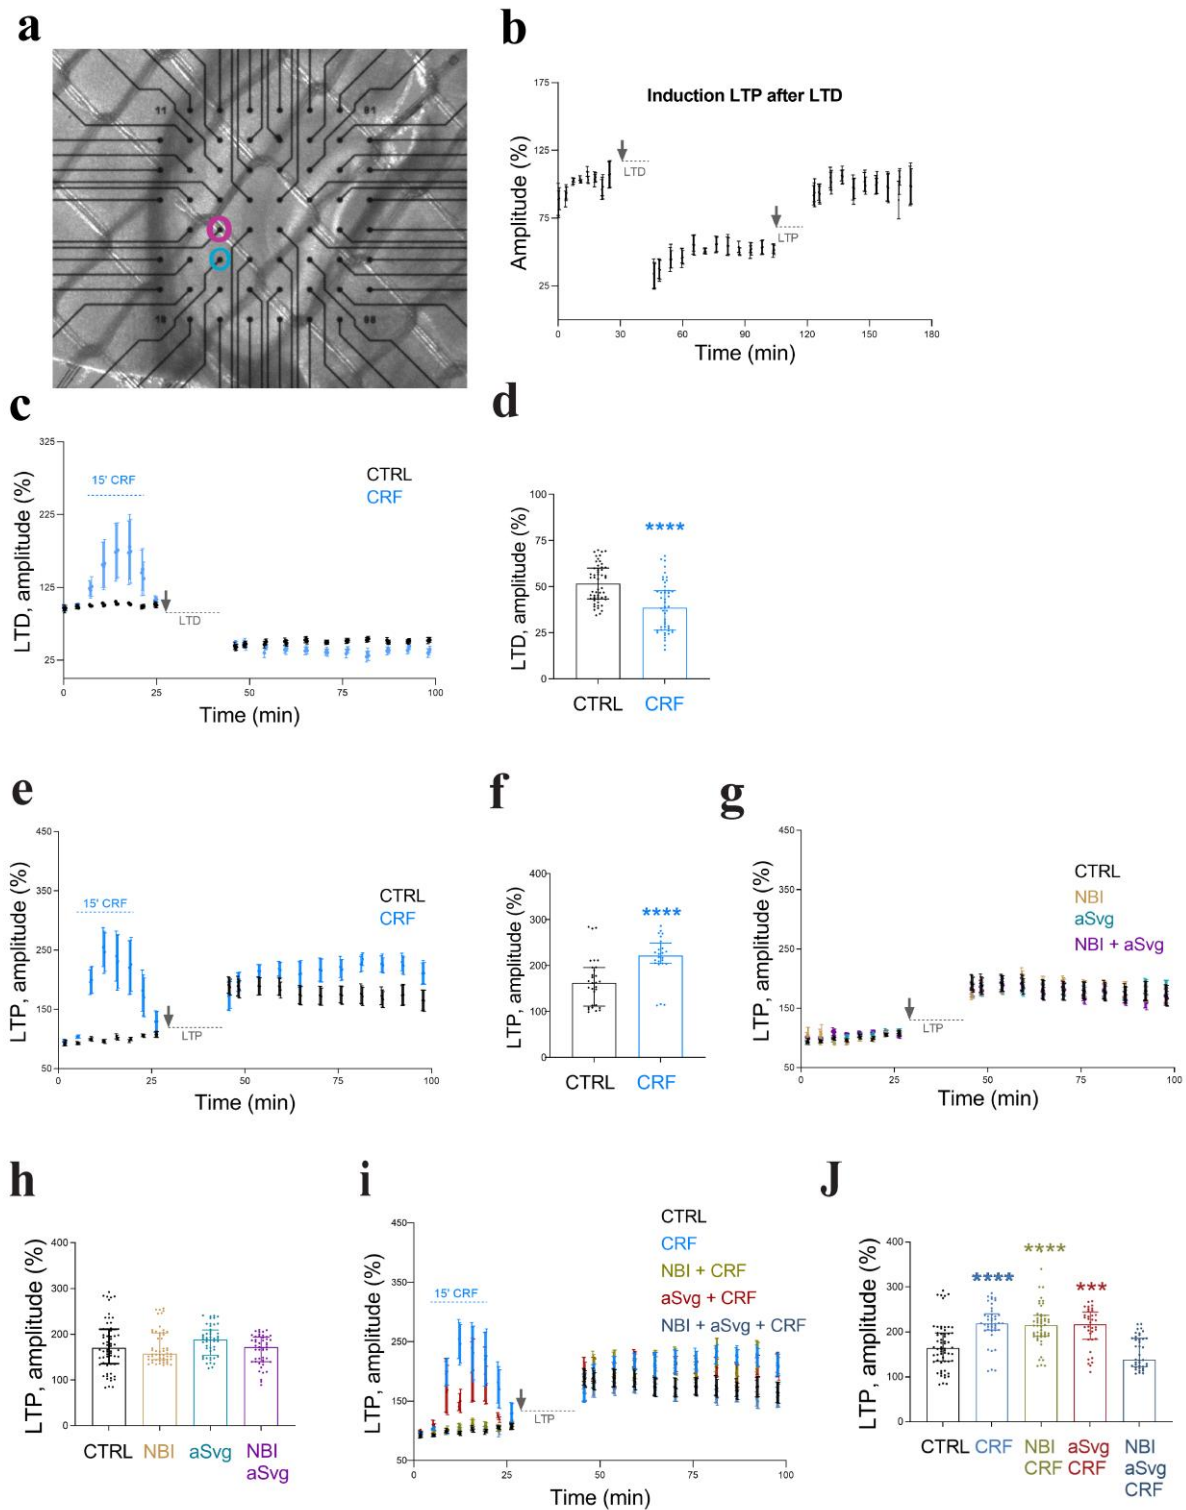

**Figure 4**

**CRF can augment long-term synaptic plasticity via CRF-R1 or CRF-R2 activation.** Multi electrode array recording of evoked fEPSP from the SC in the CA1. (a) Image of a mouse acute hippocampal slice on the multi electrode array (MEA2100; Multichannel Systems) used for field excitatory post-synaptic potential (fEPSP) recordings with the stimulation electrode (blue) and recording electrode (pink) to stimulate Shaffer collateral-CA1 connections. (b) Consecutive long-term depression (LTD) and long-term potentiation (LTP) induction. Baseline fEPSPs were recorded

for approximately 25 minutes, LTP induction protocol was applied to the same slices and recording continued for another 60 minutes. (c) –LTD in control slices (black) and slices treated with CRF (15 minutes, 100nM CRF). Treatment period indicated with dashed line (blue)). (d) Averaged fEPSC amplitude 60 minutes after LTD induction (normalized to baseline) (shown as the median with IQR. CTRL: N=9; CRF: N=8; Mann-Whitney test (U=631). \*\*\*\* $p < 0.0001$ ). CRF treatment increased LTD by 17% compared to control (e) – LTP in control slices (black) and slices treated with CRF (15 minutes, 100nM CRF. Treatment period indicated with dashed line (blue)). (f) CRF increased LTP efficiency by 32% (shown as the median with IQR. CTRL: N=11; CRF: N=9; Mann-Whitney test (U=139). \*\*\*\* $p < 0.0001$ ). (g) LTP induction in combination with either CRF-R1 blocker (NBI 1.2 $\mu$ M), CRF-R2 blocker (aSvg 150nM) or both. (h) CRF-R blockers do not affect LTP (shown as the median with IQR. CTRL: N=11; NBI: N=9; aSVG: N=8; NBI+aSVG: N=8; Kruskal-Wallis test with Dunn's multiple comparisons test (Kruskal-Wallis statistic=6.357)). (i) LTP induction using combinations of CRF-Rs blockers. Blockers were present throughout the recording. (j) Effect of CRF on LTP can be established via both CRF-Rs pathway, but no additivity was found if both pathways are available (shown as the median with IQR. CTRL: N=11; CRF: N=9; NBI: N=9; NBI+CRF: N=9; aSVG: N=8; aSVG+CRF: N=8; NBI+aSVG: N=8; NBI+aSVG+CRF: N=8; Kruskal-Wallis test with Dunn's multiple comparisons test (Kruskal-Wallis statistic=94.32). \*\*\* $p < 0.0005$ , \*\*\*\* $p < 0.0001$ ).

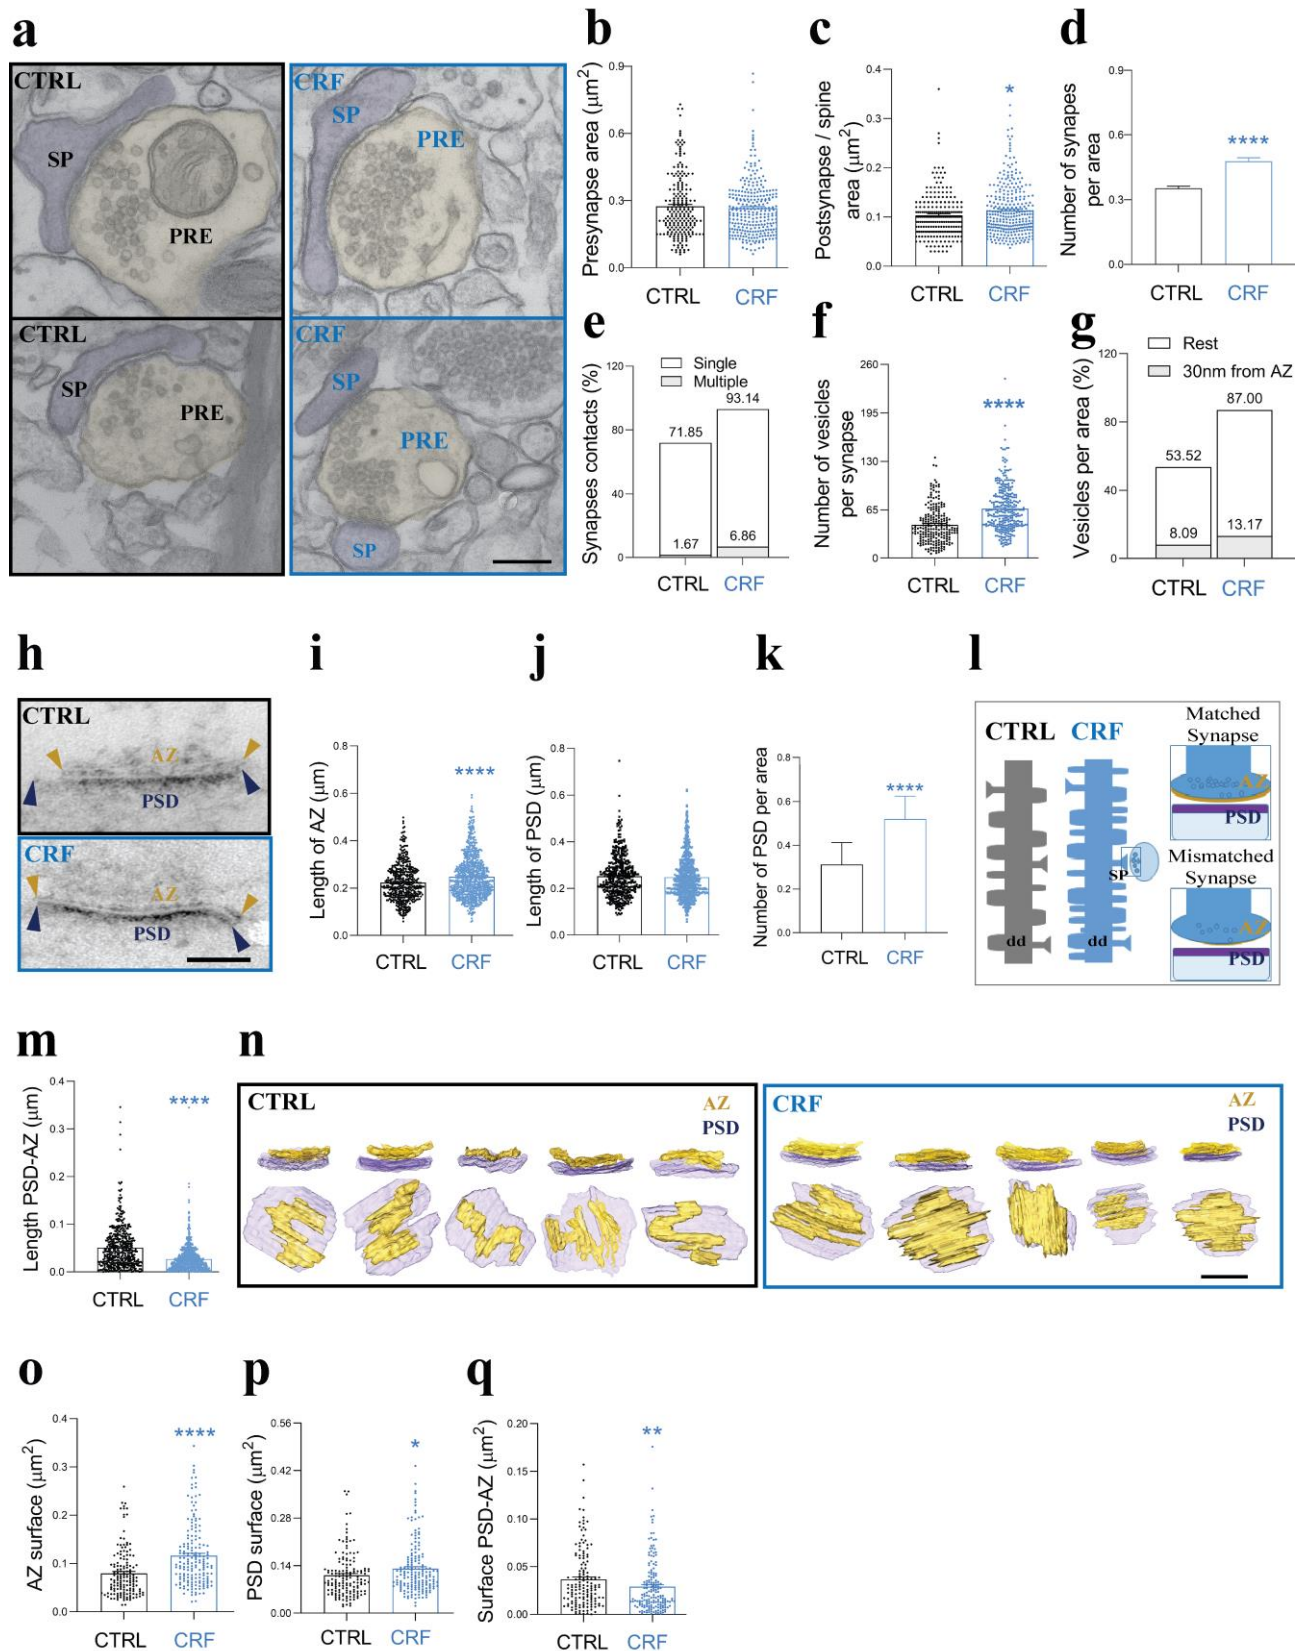

**Figure 5**

**Acute CRF alters multiple aspects of synaptic architecture.** (a) TEM images from control (CTRL) and CRF-treated acute slices. Scale bar=200nm. (b,c) Quantification of presynaptic (PRE) (b) (shown as the median with IQR. CTRL: N=3, n=216; CRF: N=3, n=283; Mann-Whitney test (U=30100). P=0.7715) postsynaptic (c) areas (spines, SP) (shown as the median with IQR. CTRL:

N=3, n=219; CRF: N=3, n=304; Mann-Whitney test (U=29456). \* $p < 0.05$ ). (d,e) CRF (100nM, 20 minutes) increased both the number of synapses per area (d) (shown as the median with IQR. CTRL: N=3, n=177; CRF: N=3, n=181; Mann-Whitney test (U=10819). \*\*\*\* $p < 0.0001$ ) and the number of multiple postsynaptic boutons per single presynapse (e). (f,g) CRF increased the total number of vesicles per synapse (f) (shown as the median with IQR. CTRL: N=3, n=220; CRF: N=3, n=305; Mann-Whitney test (U=18748). \*\*\*\* $p < 0.0001$ ), and reorganized synaptic vesicles towards the active zone (AZ) (g). (h) TEM images of PTA-stained synapses. Scale bar=100nm. (i-k) CRF increased AZ length (i) (shown as the median with IQR. CTRL: N=3, n=452; CRF: N=3, n=771; Mann-Whitney test (U=147985). \*\*\*\* $p < 0.0001$ ) and the number of PSD per area (k) (shown as the median with IQR. CTRL: N=3, n=150; CRF: N=3, n=150; Mann-Whitney test (U=3736). \*\*\*\* $p < 0.0001$ ), but not postsynaptic density (PSD) length (j) (shown as the median with IQR. CTRL: N=3, n=452; CRF: N=3, n=771; Mann-Whitney test (U=167545).  $P=0.2610$ ) (l) Relationships between AZ and PSD at the synapse. The upper right represents an idealized, matched synapse, where the lengths of AZ and PSD are approximately equal in length, while the lower a mismatched synapse where the length of the PSD is (typically) larger than the AZ. (m) CRF enhanced synaptic matching between AZ and PSD (shown as the median with IQR. CTRL: N=3, n=452; CRF: N=3, n=771; Mann-Whitney test (U=109620). \*\*\*\* $p < 0.0001$ ). (n) 3D reconstruction of AZ and PSD after FIB-SEM imaging shows a CRF dependent increase in AZ surface area (yellow) . Scale bar=150nm. (o-q) Quantification of AZ-PSD complexity using 3D reconstructed images, confirms CRF increased AZ surface area (o) (shown as the median with IQR. CTRL: N=3, n=150; CRF: N=3, n=173; Mann-Whitney test (U=8026). \*\*\*\* $p < 0.0001$ ), increased PSD surface area (p) (shown as the median with IQR. CTRL: N=3, n=150; CRF: N=3, n=173; Mann-Whitney test (U=10922). \* $p < 0.05$ ) and promoted tighter matching between them (q) (shown as the median with IQR. CTRL: N=3, n=150; CRF: N=3, n=173; Mann-Whitney test (U=10737). \*\* $p < 0.01$ ).

## Supplemental Figures

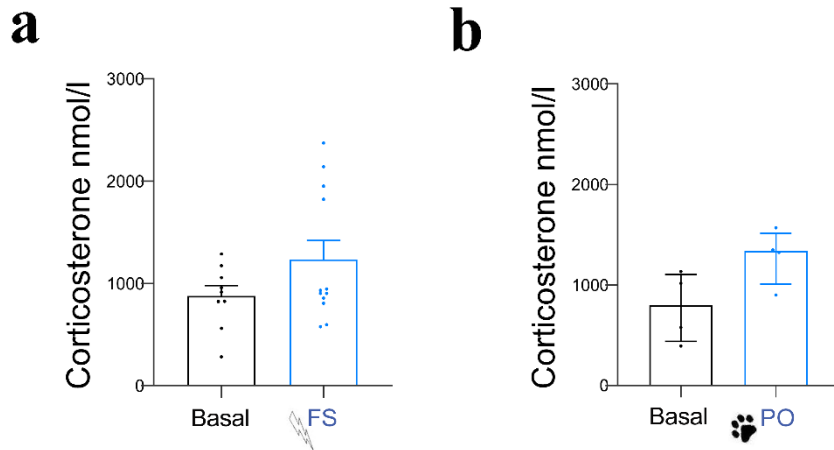

### Supplemental Figure 1

**Blood plasma levels in acute stress paradigms** (a) Quantification of corticosterone (CORT) concentrations in blood plasma after FS (a) (shown as mean $\pm$ SEM, CTRL: N=9; FS: N=12; unpaired t-test ( $t=1535$ ,  $df=19$ ).  $p=0.1413$ ) and PO (b) (shown as median $\pm$ IQR, CTRL: N=4; PO: N=4; Mann-Whitney test ( $U=2$ ).  $p=0.1143$ ).

**a**

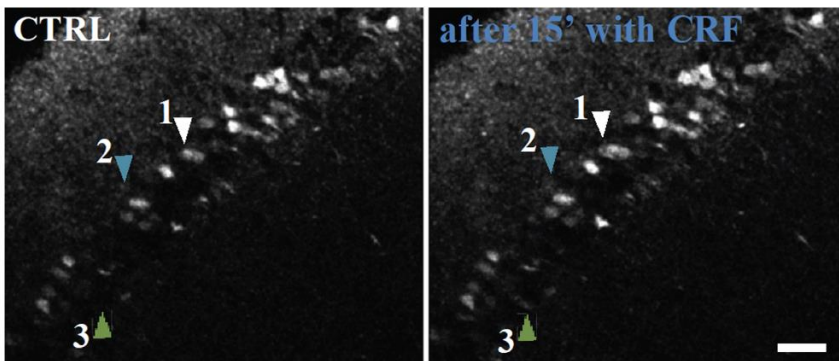

**b**

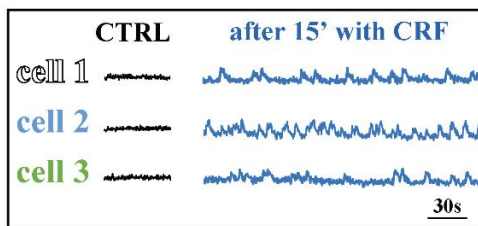

### Supplemental Figure 2

**Acute CRF exposure increases calcium release *in vivo* in CA1 PCs.** (a) Image of GCAMP+ PCs CA1 before treatment with CRF (left) and same field of view after 15 minutes with CRF 100 nM (right). Arrows indicate same cells in control and CRF conditions. Scale bar 50 $\mu$ m. (b) the traces of calcium influx of individual cells marked with arrows as in a, before (black) and after CRF application (blue).



## Supplementary Video Legends

### Supplemental Video 1.

**Acute CRF exposure increases calcium release in CA1 PC layer *in vivo*, in slices prepared from mice expressing the green fluorescent calcium indicator, GCaMP6 (Thy1-GCaMP6 mice).** (Left) two-photon microscope imaging using 20x objective started in aCSF, with a capture of 300 images (average of 15 frames per image), with a 30 ms interval. After 300 images, slice was continue perfused with 100 nM CRF in aCSF, and other 300 images were taken. (Right) after 15 minutes with CRF in aCSF, the same field of view was imaged last time, 600 images were taken with the same settings. Arrows indicate same cells in control and CRF condition. Abbreviations: aCSF-artificial cerebrospinal fluid, Ca- calcium, CTRL - control, CRF - corticotropin-releasing factor.

### Supplemental Video 2.

**FIB-SEM imaging and reconstruction of PTA staining in control hippocampal slices.** The FIB-SEM was set to remove 5-nm-thick layers and image acquisition was done using a backscattered electron detector at 1.5 kV (0.005  $\mu\text{m}/\text{pixel}$ ), at 5kX magnification. Individual segmentation of an AZ shown in yellow and PSD segment in purple (N=1). Abbreviations: AZ - active zone, CTRL - control, CRF - corticotropin-releasing factor, PSD - postsynaptic density, PTA - phosphotungstic acid.

### Supplemental Video 3.

**FIB-SEM imaging and reconstruction of PTA staining in CRF treated hippocampal slices.** The FIB-SEM was set to remove 5-nm-thick layers and image acquisition was done using a backscattered electron detector at 1.5 kV (0.005  $\mu\text{m}/\text{pixel}$ ), at 5kX magnification. Individual segmentation of an AZ shown in yellow and PSD segment in purple (N=1). Abbreviations: AZ - active zone, CTRL - control, CRF - corticotropin-releasing factor, PSD - postsynaptic density, PTA - phosphotungstic acid.
